1                   **EARLY SUBSET OF CEREBELLAR NUCLEI NEURONS DERIVED FROM**  
2                                           **MESENCEPHALON IN MICE**

3  
4           **Maryam Rahimi-Balaei<sup>1</sup>, Xiaodan Jiao<sup>1</sup>, Fiona E. Parkinson<sup>2</sup>, Behzad Yeganeh<sup>3</sup>, and Hassan**  
5                                           **Marzban<sup>1</sup>**

6  
7           <sup>1</sup>Department of Human Anatomy and Cell Science, The Children's Hospital Research Institute of  
8           Manitoba (CHRIM), Max Rady College of Medicine, Rady Faculty of Health Sciences, University of  
9           Manitoba, Winnipeg, Manitoba, Canada

10           <sup>2</sup>Department of Pharmacology and Therapeutics, University of Manitoba, Winnipeg, Manitoba, Canada

11           <sup>3</sup>Translational Medicine Program, Hospital for Sick Children and University of Toronto, Toronto,  
12           Ontario, Canada

13  
14           Address correspondence to: Dr. H. Marzban, Department of Human Anatomy & Cell Science, Rm 129  
15           BMSB, 745 Bannatyne Avenue, Max Rady College of Medicine, Rady Faculty of Health Sciences,  
16           University of Manitoba, Winnipeg, Manitoba, R3E 0J9, Canada

17  
18           **Tel:**                                           204-789-3467

19           **Fax:**                                           204-789-3920

20           **Email:**                                       [hassan.marzban@umanitoba.ca](mailto:hassan.marzban@umanitoba.ca)

21           **Manuscript:**                               37 Pages; 14 Figures; 0 Tables

22           **Key Words:**                               cerebellar nuclei, mesencephalon, neural crest, neurogenesis, neuronal  
23                                                       migration, rhombencephalon

24           **Abbreviated title:**                       Mesencephalic-derived cerebellar nuclei neurons

25           **Conflict of Interest:**                   The authors have no conflicts of interest.

## 1 **Significance Statement**

2 During cerebellar development two germinal zones are involved in cerebellar neurogenesis: the rhombic  
3 lip and the ventricular zone, which are located in the developing cerebellum itself. Our findings indicate  
4 that a subset of cerebellar nuclei neurons have an external origin, the mesencephalon, and they are the  
5 earliest born neurons that enter to the developing cerebellum. In this study, we focused on the origin of  
6 these cells and traced their migratory pathway from the mesencephalon while crossing the isthmus,  
7 followed them when they entered to the developing cerebellum. We also demonstrated their potential  
8 role on later born cells during cerebellar development.

1

2 **ABSTRACT**

3       During cerebellar development, cerebellar nuclei (CN) neurons and Purkinje cells are the earliest  
4 born among the different neuronal subtypes. Purkinje cells are the sole output of the cerebellar cortex and  
5 project to the CN. The CN represents the main output of the cerebellum, which is generated from the  
6 rhombic lip and the ventricular zone. We used immunohistochemistry, embryonic cultures, dye tracers  
7 and *in situ* hybridization to examine the origin of a new subset of CN neurons from the mesencephalon  
8 during early cerebellar development. Our results show that a subset of CN neurons, which are  
9 immunopositive for  $\alpha$ -synuclein (SNCA) and *Otx2*, originate from the mesencephalon and cross the  
10 isthmus toward the rostral end of the nuclear transitory zone. Double immunostaining of the SNCA with  
11 *Otx2* or p75 neurotrophin receptor (p75ntr) indicates that these cells are derived from neural crest cells.  
12 We also showed that this population of neurons with nerve fibers terminates at the subpial surface of  
13 putative lobules VI/VII. The SNCA<sup>+</sup>/*Otx2*<sup>+</sup>/p75<sup>+</sup> cells, which divide the cerebellar primordium into  
14 rosterodorsal and caudoventral compartments, show increased cleaved caspase-3 activation, which  
15 suggests temporary presence of these cells due to apoptosis. These results strongly suggest that early CN  
16 neurons originate from the mesencephalic neural crest population and cross the isthmus to contribute as a  
17 subset of the CN. Their temporary presence in the nuclear transitory zone suggests that these  
18 neurons/fibers play a regulatory role as a signaling center to attract early afferent pioneer axons and  
19 provide neuronal migratory pathway during early cerebellar development.

20

## 1 INTRODUCTION

2           The cerebellum is involved in a variety of brain functions including motor and non-motor functions  
3 (1, 2). Cerebellar nuclei (CN) are the main structures responsible for cerebellar output channels (3). CN  
4 plays a pivotal role in integrating signals, information processing, and cognition (4, 5). During the  
5 embryonic stage, CN and Purkinje cells (Pcs) are the only neuronal populations that exist in early  
6 cerebellar development (3, 6, 7). In the mouse, the cerebellar primordium emerges at approximately  
7 embryonic day (E) E7–E8 as a neuroepithelial swelling on the rostral lip of the fourth ventricle, which is  
8 part of the alar plate of the metencephalon (rhombomere-1) (7-10). The cerebellar primordium contains  
9 two distinct germinal zones including the ventrally-located ventricular zone (VZ) and dorsally-located  
10 rhombic lip (11).

11           It has been suggested that both glutamatergic and GABAergic CN neurons originate from the  
12 cerebellar VZ (3). Further studies highlighted the involvement of the rhombic lip as an origin for  
13 glutamatergic CN neurons (between E9-E12) (10-12). To investigate the origin of CN during the  
14 cerebellar embryonic stages, our data suggest that the mesencephalon may be a novel origin of newly  
15 characterized neurons that contribute to CN formation and development. In this context, the earliest  
16 neuronal outgrowth during central nervous system (CNS) development occurs in E9 in the mesencephalic  
17 nucleus of the trigeminal nerve (MesV) (13, 14). MesV are considered to be the large sensory neurons  
18 and are derived from the neural crest cell (NCC) population (15, 16). At the embryonic stage, NCCs arise  
19 from the transient neural crest that initially generates neural crest stem cells, in which migrating cells  
20 express the early neural crest marker, p75 neurotrophin receptor (p75ntr; e.g. (17, 18)). Neuronal  
21 proliferation/differentiation is regulated by p75ntrs that are mainly expressed during early development  
22 (19-21). In addition, previous studies suggest that the orthodenticle homeobox 2 (*Otx2*) plays an essential  
23 role in the development of the mesencephalic neural crest-derived neurons and also the cells of the  
24 rhombic lip choroid plexus (22-24). The mesencephalic NCCs express *Otx2* during migratory phase (23).

1           The LIM homeobox transcription factor 1, alpha (*Lmx1a*), is an important regulator of CN  
2 neurogenesis which originate from the rhombic lip. It is also expressed in the nuclear transitory zone  
3 (NTZ) and is considered to be a marker for majority of rhombic lip-derived CN neurons beside subset of  
4 the *Lmx1a* positive cells that do not originate from the rhombic lip migratory stream (25, 26). In this study,  
5 we hypothesized that a subset of the CN neurons originate from mesencephalic NCC and migrate caudally  
6 toward the NTZ during early cerebellar development. Our findings suggest that the mesencephalon may  
7 be a third germinal zone, which is source of the earliest population of the CN neurons and probably  
8 present temporarily in the NTZ. These finding are in corroboration with the findings of Nickolus and  
9 Bruce (27) which suggest the lineage of Wnt-1 give rise to neural crest and hind brain migration.  
10 Additionally, we studied  $\alpha$ -synuclein (SNCA; a lipid-associated protein), which is expressed in the somata  
11 of CN neurons and axon terminals in the cerebellum, and interacts with proteins such as tau, tubulin, and  
12 actin (28-30). We evaluated SCNA because it is considered to be involved in the development of neural  
13 stem cells and synaptogenesis in developing neurons (28, 31).

14

15

## 1 **Material and Methods**

### 2 *Animal maintenance*

3 All animal procedures were performed in accordance with institutional regulations and the *Guide*  
4 *to the Care and Use of Experimental Animals* from the Canadian Council for Animal Care. In this study,  
5 we used embryos from 36 CD1 timed-pregnant mice at E9 to E18, three CD1 mice at postnatal day (P)  
6 P4, three prostatic acid phosphatase (PAP) mutant timed-pregnant mice at embryonic day (E) E12 (The  
7 PAP KO mice were obtained from Dr. Pirkko Vihko, University of Helsinki, Finland). We used PAP KO  
8 mice (32, 33), since they do not express SNCA and are valuable experimental tool to understand the role  
9 of SNCA in subset of CN neurons.

10 All timed-pregnant CD1 mice were obtained from the Central Animal Care Service, University of  
11 Manitoba. Animals were kept at room temperature and relative humidity (18–20°C, 50–60%) on a light  
12 and dark cycle (12:12 h) with free access to food and water. The embryo age was determined from the  
13 first appearance of a vaginal plug, considered to be E 0.5. CD1 timed-pregnant mice at E (9, 10, 11, 12,  
14 13, 14, 15, 16 and 18) + 0.5 (N=36) and three PAP mutant timed-pregnant mice at E12 were anesthetized  
15 [40% isoflurane, USP (Baxter Co. Mississauga, Ontario, Canada)] and embryos were removed and fixed  
16 in 4% paraformaldehyde (PFA) for immunohistochemistry (IHC) or prepared for Western Blotting. Three  
17 CD1 mice at P4 were transcardially perfused with PBS for IHC, as described previously (34, 35)

18

### 19 *Sections immunohistochemistry*

20 Cryostat sections (20 µm) of PFA 4% fixed samples were utilized for IHC process as explained in  
21 our previous studies (34, 35). Antibody dilutions were used as follows:  $\alpha$ -synuclein (sc-69977, Santa Cruz)  
22 1:500, p75NTR (8238, Cell Signaling) 1:1000, Lmx1a (AB10533, EMD Millipore Corporation) 1:500,  
23 Otx2 (ab114138, abcam) 1:1000, NAA (3A10, Developmental Studies Hybridoma Bank) 1:500,  $\beta$ Tubulin  
24 (T8328, Sigma-Aldrich) 1:2000, TrkA (ab76291, abcam) 1:50, and Cleaved Caspase 3 (9664, Cell

1 Signaling) 1:200. Fluorescent detection was performed using antibodies as follows: Streptavidin, Alexa  
2 Fluor® 488 conjugate, Alexa Fluor® 568 Goat Anti-Rabbit IgG (H+L), Alexa Fluor 488 Chicken Anti-  
3 Mouse IgG (H+L), Alexa Fluor 488 Chicken Anti-Rabbit IgG (H / L), and Alexa Fluor 568 Goat Anti-  
4 Mouse IgG (H+L) (S-11223, A-11036, A21200, A21441, A11004 Life Technologies) 1:1000. Detection  
5 of peroxidase IHC was also performed as described previously (34-36) using HRP conjugated goat anti-  
6 rabbit IgG and goat anti-mouse IgG (H+L) antibodies (EMD Millipore Corporation, 12-348 and AP308P,  
7 respectively) 1:500, and developed with DAB (3,3'-diaminobenzidine) solution (Sigma, St. Louis MO,  
8 USA).

9

#### 10 *Whole mount immunohistochemistry*

11 Whole mount IHC was performed on embryos according to Sillitoe and Hawkes (37) with a few  
12 modifications. Briefly, PBS containing 0.2% skim milk (Nestlé Foods Inc., North York ON, Canada) plus  
13 0.1% Triton-X 100 (Sigma, St. Louis MO, USA) and 5% dimethyl sulfoxide (DMSO) at 4°C overnight  
14 was used as the blocking solution (PBSMT). After primary and secondary incubation, the  
15 immunoreactivity was revealed by DAB, and then the tissue was washed in PBS and stored in PFA for  
16 analysis.

17

#### 18 *Primary dissociated cerebellar culture*

19 Primary cerebellar cultures were prepared from embryonic (E) day 10 CD1 mice, and cells were  
20 maintained for varying days *in vitro* (DIV 1, 2, 3, 5, and 8), according to published methods (35). Briefly,  
21 the entire cerebellum was removed from each embryo and immediately placed into ice cold  $\text{Ca}^{2+}/\text{Mg}^{2+}$ -  
22 free Hank's balance salt solution (HBSS) containing gentamicin (10 µg/ml) and glucose (6 mM). The  
23 cerebella were incubated at 34°C for 12 min in HBSS containing 0.1% trypsin. After washing, the  
24 cerebella were gently triturated in HBSS containing DNase I (5 U/ml) and 12 mM  $\text{MgSO}_4$  until the cell

1 mass was no longer visible. The cells were collected by centrifugation (1,200 rpm, 4°C for 5 min) and re-  
2 suspended in seeding medium (1:1 Dulbecco's modified Eagle's medium and F12) supplemented with  
3 putrescine (100 µM), sodium selenite (30 nM), L-glutamine (1.4 mM), gentamicin (5 µg/ml), and 10%  
4 heat-inactivated fetal bovine serum. The cell suspensions were seeded on poly-L-ornithine coated glass  
5 coverslips (12 mm) at a density of  $5 \times 10^6$  cells/ml, with each coverslip placed into the well of a 24-well  
6 plate. After 6–8 h incubation in a CO<sub>2</sub> incubator (100% humidity, 37°C, 5% CO<sub>2</sub>), 500 µl of culture  
7 medium supplemented with transferrin (200 µg/ml), insulin (20 µg/ml), progesterone (40 nM), and  
8 triiodothyronine (0.5 ng/ml) was added to each culture well. After 7 days, half of the medium in each dish  
9 was replaced with fresh medium that was additionally supplemented with cytosine arabinoside (4 µM)  
10 and bovine serum albumin (100 µg/ml) (35, 38, 39).

11  
12 *Embryonic cultures and DiI labeling of cells within the mesencephalon*

13 Embryonic cultures were prepared from E9 and E10 CD1 timed-pregnant mice, and embryos were  
14 maintained for various DIV (4, and 6). Each embryo was removed from the amniotic sac and immediately  
15 placed into ice cold Ca<sup>2+</sup>/Mg<sup>2+</sup>-free HBSS containing Gentamicin (10 µg/ml) and glucose (6 mM).  
16 Embryos were placed into 24-well plates in culture medium plus 10% fetal bovine serum and incubated  
17 in a CO<sub>2</sub> incubator (100% humidity, 37°C, 5% CO<sub>2</sub>) (38). Embryos were monitored every 6 h to evaluate  
18 the heart beat during incubation as a survival sign. On the desired day, each well was fixed with 4% PFA  
19 and prepared for whole mount IHC.

20 For neuronal tracing and labeling, we used the FAST DiI crystal (FAST DiI™ solid; DiIΔ9,12-  
21 C18(3), CBS (1,1'-Dilinoleyl-3,3,3',3'-Tetramethylindocarbocyanine, 4-Chlorobenzenesulfonate, D7756,  
22 Fisher Scientific). Briefly, FAST DiI was inserted to the mesencephalon at E9 using a sharp-ended needle.  
23 After insertion of FAST DiI, images were captured by stereomicroscope to monitor the location of DiI at  
24 day *in vitro* 0 (DIV 0). After placing the embryos into 24-well plates in culture medium, embryos were



1 monitored every 6 hours and fixed with 4% PFA on the desired day, then whole mount IHC with NAA  
2 was performed to visualize neural fibers growth and followed by sectioning and imaging of the DiI  
3 positive cells in mesencephalon and cerebellar primordium.

4

#### 5 *In Situ Hybridization (ISH)*

6 All of the ISH experiments were carried out on the E12 CD1 mice using RNAscope ACD  
7 HybEZ™ II Hybridization System and RNAscope® Multiplex Fluorescent Reagent Kit v2 (Advanced Cell  
8 Diagnostics, Hayward, CA, USA). Briefly, embryos were fixed in 10% (vol/vol) neutral buffered formalin  
9 at room temperature for 24 h, dehydrated, and embedded in paraffin. Tissue sections cut at 10 µm thickness  
10 were processed for RNA *in situ* detection according to the manufacturer's user manual. Sequences of the  
11 probes used in the study are as follows: Mm-Fgf8 (313411, ACD), Mm-Wnt1-C2 (401091-C2, ACD),  
12 Mm-Otx2-C3 (444381, ACD). Fluorophores (TSA® Plus, Perkin Elmers, Waltham, MA, USA) used in  
13 the study are as follows: Fluorescein (NEL741E001KT), Cyanine 3 (NEL744E001KT), and Cyanine 5  
14 (NEL745E001KT).

15

#### 16 *Western Blotting Analyses*

17 Equal amount of proteins were separated by SDS/PAGE in 10–15% precast gels (Bio-Rad,  
18 Hercules, CA, USA) and transferred onto the PVDF-membrane. For the Western blot analysis, membranes  
19 were blocked in 5% nonfat dry milk (NFDM) in TBS containing 0.02% Tween 20 (TBST) and then  
20 incubated overnight at 4°C with primary antibodies as follows:  $\alpha$ -synuclein (sc-69977, Santa Cruz)  
21 1:2000, p75NTR (8238, Cell Signaling) 1:1000, Caspase 3 (9665, Cell Signaling) 1:1000, and Cleaved  
22 Caspase 3 (9664, Cell Signaling) 1:1000. Secondary antibodies as follows: HRP conjugated goat anti-  
23 mouse IgG (AP308P, Millipore) 1:6000 and HRP conjugated goat anti-rabbit IgG (12-348, Millipore)

1 1:6000. Binding was assessed using the Enhanced Chemiluminescence (ECL) protocol on Scientific  
2 Imaging Film.

3

#### 4 *Imaging and figure preparation*

5 For bright field microscopy, images were captured using Zeiss Axio Imager M2 microscope  
6 (Zeiss, Toronto, ON, Canada). Images were then analyzed with a Zeiss Microscope Software (Zen Image  
7 Analyses software) (Zeiss, Toronto, ON, Canada). For fluorescence microscopy of the entire cerebellum  
8 sections, a Zeiss Lumar V12 Fluorescence stereomicroscope (Zeiss, Toronto, ON, Canada) equipped with  
9 a camera was used to capture the images. Images were then analyzed using Zen software. For high  
10 magnification fluorescence microscopy, a Zeiss Z1 and Z2 Imager and a Zeiss LSM 700 confocal  
11 microscope (Zeiss, Toronto, ON, Canada) equipped with camera and Zen software were used to capture  
12 and analyze images. Images were cropped, corrected for brightness and contrast, and assembled into  
13 montages using Adobe Photoshop CS5 Version 12.

14

15

16

## 1 RESULTS

2 *The early subset of CN neurons at the rostral end of the cerebellar primordium are derived from the*  
3 *mesencephalon*

4 In mouse embryos, at the rostral end of the cerebellar primordium a few cells are immunopositive  
5 for neuronal marker such as neurofilament-associated antigen (NAA) 3A10 (40) at the early stage of E9  
6 (Fig. 1A-D). To explore whether these cells cross the isthmus, we used anti-alpha-synuclein (SNCA)  
7 antibody, which is expressed in subset of CN neurons (28). In a sagittal section of the E9 cerebellar  
8 primordium, we found that SNCA<sup>+</sup> neurons run from the dorsal mesencephalon, cross the isthmus, and  
9 pass in through the rostral end of the NTZ (Fig. 1E-F). To determine the position of the SNCA<sup>+</sup> cells in  
10 the NTZ compared to the rhombic lip-derived *Lmx1a*<sup>+</sup> CN neurons (E10-12) (11), double  
11 immunocytochemistry of SNCA and *Lmx1a* was performed on sagittal sections of E12 cerebellar  
12 primordium (Fig. 2 A-D, medial section and Fig. E-H, lateral section). This shows that an *Lmx1a*<sup>+</sup>  
13 population of CN neurons, which extends from the rhombic lip, flanks SNCA<sup>+</sup> neurons in the NTZ that is  
14 continues rostrally to the mesencephalon (Fig. 2A, E). The majority of neurons are not SNCA<sup>+</sup>/*Lmx1a*<sup>+</sup>  
15 but some of the neurons are co-labeled, and the latter may be because the cells are overlapped (Fig. 2 D,  
16 H).

17 To explore the possibility that the SNCA<sup>+</sup> cells originate from the mesencephalon, *Otx2* IHC was  
18 performed during early cerebellar development. *Otx2* is highly expressed in the mesencephalon and its  
19 caudal limit is the boundary with the metencephalon (i.e. the isthmus) (22). However, IHC at the sagittal  
20 section of E12 cerebellum showed that a subset of *Otx2*<sup>+</sup> cells from the mesencephalon continue caudally,  
21 cross the isthmus and end in the rostral region of cerebellar primordium (Fig. 3 A-B, medial) and Fig 3 C-  
22 D, lateral). To understand whether the *Otx2*<sup>+</sup> cells that continue to the NTZ are SNCA<sup>+</sup>, double IHC with  
23 *Otx2* and SNCA was performed in E12 sagittal sections. *Otx2* is highly expressed in the mesencephalon

1 (Fig. 4A, B), and was co-expressed with SNCA<sup>+</sup> cells in the NTZ (Fig. 4C-E). Primary dissociation of  
2 cerebellar culture at E10 and DIV 4 showed that SNCA<sup>+</sup> cells were co-expressed with *Otx2* (Fig. 4 F–H).

3 To determine whether mesencephalic-derived early CN neuron express *Otx2*, *Wnt1*, and *Fgf8* in  
4 cerebellar primordium at E12, we employed highly-sensitive RNAscope ISH, which allowed us to  
5 simultaneously detect three probes. *Otx2* mRNA signal is highly expressed in the mesencephalon and  
6 extend a tail caudally cross the isthmus to the rostral cerebellar primordium in NTZ (Fig 5 D). *Wnt1*  
7 mRNA signal is high in the mesencephalon and isthmus similar to *Otx2*<sup>+</sup> cells, extend to the rostral  
8 cerebellar primordium in NTZ (Fig 5. E). *Fgf8* mRNA signal is present in few scattered cells in rostral  
9 end of the cerebellar primordium (Fig 5. F). *Otx2*<sup>+</sup> cells at NTZ are co-expressed with *Wnt1*<sup>+</sup> cells (Fig5.  
10 A, B and G).

11 The results of IHC and ISH experiment suggest that the subset of CN neurons are possibly derived  
12 from the mesencephalon. To confirm these findings, we used FAST DiI as a neuronal tracer to further  
13 investigate mesencephalic derived CN cell migration. We applied FAST DiI with a sharp-ended needle in  
14 dorsum of caudal mesencephalon (Fig. 6 A, a). After 4 days *in vitro*, mesencephalic-derived cells which  
15 are stained with DiI clearly present and migrate in both rostrally (Fig. 6B) and caudally (Fig. 6C)  
16 directions. Sections from the mesencephalon and cerebellar primordium shows that mesencephalic  
17 derived cells are present in the rostral of the cerebellar primordium in putative NTZ in medial (Fig. 6 D-  
18 F) and lateral (Fig. 6 G-I) sections. To expose the earliest cell population in mesencephalon to DiI and  
19 avoid of unwanted cell staining due to long exposure to DiI, we focused on early time point of the  
20 cerebellar development, i.e. at E9. It is reported that the earliest neuronal population in CNS are present  
21 in mesencephalon and project caudally (41). To determine whether early generation of mesencephalic  
22 cells migrate to the cerebellar primordium, the DiI exposure time to mesencephalic cells limited for only  
23 24 hours (Fig. 7 A,a) and then the inserted DiI removed (Fig. 7 B, E). To our surprise, almost all DiI+  
24 cells migrated caudally toward the cerebellar primordium, not rostrally (Fig. 7B, C, D, E). The DiI staining

1 is clear and strong in some cells (Fig. 7 D, d and arrowhead in G'), although the DiI+ red signal is seen in  
2 other cells in the rostral end of the cerebellar primordium, but is weak and seems fading (Fig. 7 E-G').

3

#### 4 *Early CN neuron originate from mesencephalic neural crest*

5 The mesencephalic neural crest cells during the migratory phase express *Otx2* gene (23). At the  
6 embryonic stage, neural crest stem cells (NCSCs) arise from the transient neural crest and create tissues  
7 that initially generate neural crest stem cells, in which migrating cells express p75<sup>ntr</sup>, the early neural  
8 crest marker (19). Neuronal proliferation/differentiation and the neuronal fiber formation are regulated by  
9 p75<sup>ntr</sup>, which is mainly expressed during early development (20, 21). The p75<sup>ntr</sup> (a typical neural crest  
10 cell marker) (17, 18) was used to test for SNCA<sup>+</sup>/*Otx2*<sup>+</sup> cells that arise probably from the neural crest  
11 population.

12 To determine whether SNCA<sup>+</sup>/*Otx2*<sup>+</sup> neurons are p75<sup>ntr</sup> immunopositive, double immunostaining  
13 with SNCA was performed. Section IHC revealed that SNCA<sup>+</sup> cells in the NTZ were co-labeled with  
14 p75<sup>ntr</sup> that is localized in the cell membrane (Fig. 8A–C, H). This data was further confirmed by Western  
15 blot analysis of SNCA and p75<sup>ntr</sup> expression during different embryonic days, E11, E13 and E15 (Fig.  
16 8h). In addition, in primary dissociated cerebellar culture at E10, DIV 3 showed that p75<sup>ntr</sup> is expressed  
17 with SNCA<sup>+</sup> neuronal cell membrane (with punctate appearance, Fig. 8 D–G (21)). P75<sup>ntr</sup> and TrkA  
18 (which also labels neural crest-derived neurons) (42–45) are two distinct nerve growth factor receptors  
19 that probably form a ternary TrkA/NGF/p75 complex (46). To determine whether TrkA is expressed in a  
20 subset of neurons in the NTZ, we have performed double immunostaining with NAA and showed TrkA  
21 and NAA co-expression in the NTZ (Fig. 8 I–K).

22 Immunostaining with NAA 3A10 showed that a set of the neurons and neuronal processes are  
23 present in the NTZ in the cerebellar primordium core at E12 (Fig. 9A). To determine whether the NAA  
24 3A10<sup>+</sup> combination of neurons and neuronal processes at the core of cerebellar primordium express

1 p75<sup>ntr</sup>, double immunostaining was performed (Fig. 9A–C, H). The results showed that the NAA<sup>+</sup>/p75<sup>ntr</sup>  
2 combination of neurons and neuronal processes from the isthmus continue to the NTZ and terminate on  
3 the subpial surface at the midpoint of the rostrocaudal cerebellar primordium (Fig. 9H). In dissociated  
4 embryonic cerebellar culture at E10, DIV 21 showed that p75<sup>ntr</sup> immunoreactivity is localized in the  
5 membrane of NAA<sup>+</sup> neuronal somata and process (Fig. 9 D–G).

6 Double IHC of p75<sup>ntr</sup> with SNCA at E10 showed that expression is mostly localized in neurons  
7 at the caudal end (Fig. 10A–D), while at E12, expression is also localized in the neurons at the rostral end  
8 of the NTZ (Fig. 10 E–H). P75<sup>ntr</sup><sup>+</sup>/SNCA<sup>+</sup> neurons and neuronal processes combine at the cerebellar  
9 primordium core and terminate on the subapical surface at the rostrocaudal midway point of the cerebellar  
10 primordium, probably at putative lobules VI/VII (Fig. 10 A–H).

11

#### 12 *Transient expression of SNCA in a subset of CN neurons*

13 To understand the fate of SNCA and SNCA<sup>+</sup> cells in a subset of CN neurons, the following  
14 experiments were performed. First, we determined that the pattern of SNCA expression in the rostral  
15 cerebellar primordium was prominent in the CN from E9 to E13(Figs 1 and 2). At E14, SNCA expression  
16 was weak in neuronal cell body (Fig. 11A, B, b). At E15/16, SNCA expression disappeared from the CN  
17 neuronal cell bodies (28) (data not shown). Around the perinatal cerebellum, SNCA expression was  
18 localized to the axonal terminal field and there was no SNCA expression in any cell body on the cerebellar  
19 cortex and CN (Fig. 11 C–E). To understand the role of SNCA in the mesencephalic derived CN neurons,  
20 we used PAP mutant mouse cerebellum, in which the expression of  $\alpha$ -synuclein (SNCA) is absent. In our  
21 study, using RT-PCR for PAP-null mice, genomic DNA showed that SNCA is not present in this mouse  
22 (supplementary 12 A). IHC in the adult control cerebellum shows SNCA expression in the axonal  
23 terminal, while SNCA is not expressed in the PAP-null mouse (supplementary 12 B). The lack of SNCA  
24 expression in PAP-null cerebellum has also been confirmed by Western Blot (data not shown). Thus,

1 PAP-null mouse embryo is a promising model to understand the role of SNCA in this subset of CN neurons  
2 in the NTZ during early cerebellar development. Double IHC with SNCA and p75<sup>ntr</sup> at E12 showed that  
3 the p75<sup>ntr</sup> cells are present in NTZ, but there was no SNCA expression compared with wild type (Fig.  
4 12 A-F). PAP-null mouse behavior and motor activity was monitored for about 15 months, and no obvious  
5 motor disability was observed. However, PAP-null mice seemed to be more active compared with the  
6 wild type mice even at older ages.

7 To further our understanding of the SNCA expression in early cerebellar development, primary  
8 dissociated cerebellar culture at E12, DIV 5 was double immunostained with  $\beta$ -tubulin. This experiment  
9 shows localization of SNCA in cytoplasm (Fig. 8G and 13E), and SNCA can also be localized in the  
10 nucleus (Fig. 13 A–D). Embryonic cerebellar culture from mouse embryo at E10 revealed that SNCA  
11 expression is localized in both the cytoplasm (arrow) and nucleus (arrow head) at DIV 6 (Fig. 13 E–G);  
12 however, at DIV 13, SNCA seems to be aggregated in cells or cell clusters (Fig. 13 H–J). SNCA  
13 aggregation is a major cause of neurodegeneration (47), and therefore it may indicate that SNCA<sup>+</sup> cells in  
14 the NTZ undergo the cell death. To explore whether SNCA<sup>+</sup> cells undergo programmed cell death, cleaved  
15 caspase-3 IHC was performed and the results showed that some SNCA<sup>+</sup> cells in the NTZ express cleaved  
16 caspase-3 (Fig. 14 A-D). Western blot analysis revealed activation of caspase 3 in embryonic cerebellum  
17 (Fig. 14 A). In early embryonic cerebellar sections, cleaved caspase-3 was present in a combination of  
18 neurons and neuronal fibers, and direct toward the subpial surfaces at the mid-point between the rostral  
19 and caudal cerebellar primordium (Figs. 10 E, and 14 A–D). Cleaved caspase-3 activity is also high in the  
20 ophthalmic component of the trigeminal ganglion, a source of early afferent to cerebellar primordium  
21 (Fig. 14 F–G). Trigeminal ganglion is outlined in whole mount immunohistochemistry with NAA (Fig.  
22 14E).

23

24

## 1 **DISCUSSION**

2           In this study, we investigated the mesencephalic-derived CN neurons during early cerebellar  
3 development. We showed that a novel subset of CN neurons (SNCA<sup>+</sup>/Otx2<sup>+</sup> neurons) run from the dorsal  
4 mesencephalon and cross the isthmus to the NTZ as early as E9. This suggests the presence of a new  
5 germinal zone during cerebellar neurogenesis. Further, these cells are Otx2<sup>+</sup>/p75ntr<sup>+</sup>/Wnt1<sup>+</sup>/TrkA<sup>+</sup>,  
6 suggesting that this subset of CN neurons is probably derived from the mesencephalic neural crest  
7 population. This novel subset of CN neurons are accompanied by the nerve fibers that express activated  
8 caspase-3, restricted within the cerebellar primordium core. Our results indicate that this subset of the CN  
9 neurons/fibers are temporarily present at the cerebellar primordium core and terminate at the midway  
10 point of the rostrocaudal subpial surface. This suggests that the mesencephalic derived  
11 SNCA<sup>+</sup>/Otx2<sup>+</sup>/p75ntr<sup>+</sup> combination of neurons/fibers probably plays a role as a transient signaling center.

12  
13 *Early subset of CN neurons originate from the mesencephalon*

14           Recent genetic fate mapping studies suggested that most CN projection neurons may arise from  
15 the rhombic lip (11, 48, 49). The transcription factor expression patterns suggest that CN neurons migrate  
16 from the rhombic lip to the NTZ through a subpial stream pathway while sequentially expressing the genes  
17 *Pax6*, *Tbr2*, and *Tbr1* (7, 11).

18           The origin of the SNCA<sup>+</sup> neurons is currently not clear, but the rostral continuity of these neurons  
19 from the NTZ indicates that they may arise from the mesencephalon. *Tbr1*<sup>+</sup>/*Lmx1a*<sup>+</sup> neurons are born in  
20 the rhombic lip at E9, but they do not reach the NTZ until around E10 (11, 50). Our study showed that  
21 SNCA<sup>+</sup> cells are a group of differentiating neurons (NAA<sup>+</sup>) present in NTZ at E9, before the arrival of  
22 any neurons that originate in the rhombic lip. Although, most SNCA<sup>+</sup> neurons are not *Lmx1a*<sup>+</sup>, some of  
23 the neurons are co-labeled with SNCA. This suggests that in the early stages of CN neurogenesis, the  
24 pattern of protein expression in SNCA<sup>+</sup> neurons is changing, possibly with SNCA being down-regulated



1 and *Lmx1a*<sup>+</sup> being up-regulated, or this may not occur at all (Fig. 2). The NTZ is an intercalated area of  
2 the SNCA<sup>+</sup>/*Lmx1a*<sup>+</sup> cells, and it shows the continuation of SNCA<sup>+</sup> to the rostral end and *Lmx1a*<sup>+</sup> to the  
3 caudal end as a source of origin.

4 To further study this hypothesis, we investigated *Otx2* expression in this subset of neurons in the  
5 developing cerebellum. *Otx2* has been shown to be involved in prosencephalon and mesencephalon  
6 establishment, but not the rhombencephalon (51, 52). *Otx2* is required for the development of the forebrain  
7 and midbrain, while *Gbx2* is necessary for development of the anterior hindbrain (53, 54). Our results  
8 indicate that the SNCA<sup>+</sup> cells in the NTZ express *Otx2*. In addition, *Wnt1* which is expressed in  
9 mesencephalon (55) is co-expressed with *Otx2*<sup>+</sup> cells in rostral cerebellar primordium, but not *Fgf8*.  
10 Considering that mesencephalic cells are *Otx2*<sup>+</sup> (23), we suggest that SNCA<sup>+</sup> and *Otx2*<sup>+</sup> cells in cerebellar  
11 primordium originate from the mesencephalon. Using embryonic culture with inserted DiI, we clearly  
12 showed that mesencephalic derived cells through the rostral end migrate to the cerebellar primordium.  
13 This strongly suggests that the caudal mesencephalon may play a role as a third germinal zone, which  
14 forms a subpopulation of CN neurons that likely predates all neurogenesis in the cerebellar primordium.

15  
16 *SNCA<sup>+</sup>/Otx2<sup>+</sup> cells with p75<sup>ntr</sup>/NAA reveal a combination of neurons and neuronal fibers at the core of*  
17 *cerebellar primordium*

18 The neuronal precursor in the mesencephalon arises from neuroepithelium and neural crest cell  
19 population (13, 15, 16). In the mesencephalon, the mesencephalic nucleus of the trigeminal nerve is the  
20 large sensory neurons which are derived from the neural crest (16, 56, 57). They are the earliest neuronal  
21 outgrowths that have been detected in the central nervous system, and are the first differentiated neurons  
22 in the mouse brain at E9 (13, 16). It is also suggested that *Otx2* is expressed in migrating mesencephalic  
23 neural crest cells (23). We showed that SNCA<sup>+</sup>/*Otx2*<sup>+</sup> cells are *Wnt1*<sup>+</sup> that is expressed in precursors of the  
24 neural crest and substantially contribute to the CN (58). In addition, we showed that SNCA<sup>+</sup>/*Otx2*<sup>+</sup> cells

1 are p75<sup>ntr+</sup> and TrkA<sup>+</sup>, both are the nerve growth factor (NGF) receptor expressed in neural crest cells  
2 (18, 42, 45, 46). Therefore, this suggests that SNCA<sup>+</sup>/Otx2<sup>+</sup>/p75<sup>ntr+</sup>/TrkA<sup>+</sup> neurons in the NTZ arise from  
3 the mesencephalic nucleus of the trigeminal nerve. The neural crest cells are a highly migratory  
4 multipotent cell population that arises from the neural fold and gives rise to a wide variety of cell types  
5 (e.g. (59-61)). A neural crest-derived subpopulation in the CNS represents a great research potential  
6 because neural crest-derived cells may have the capacity for neurogenesis and regeneration, e.g. in the  
7 olfactory system (62, 63).

8  
9 *Transient expression of SNCA in mesencephalic-derived CN neurons*

10 During cerebellar development, the prominent SNCA expression in CN neuron somata is  
11 transiently initiated, and at around E15–16, its expression in the developing cerebellum may diffused into  
12 neuronal fibers (Fig. 9). This dynamic expression pattern is in agreement with other studies on SNCA  
13 expression patterns in embryos (28). In our study, we did not detect SNCA expression in any neuronal  
14 somata in the cerebellar cortex and CN during perinatal development. It has been suggested that the SNCA  
15 may be involved in neuronal migration, neural cell fate and differentiation (64). However, our study on  
16 the PAP/SNCA-null mouse showed that the mesencephalic-derived cells migrate to the NTZ, which  
17 indicates that a lack of SNCA is not involved in the migration. Therefore, the cytoarchitecture and function  
18 of the cerebellum was not affected despite the absence of SNCA, and there may be a redundancy using  
19 other molecules to compensate for the loss of SNCA function.

20 The nuclear localization of SNCA was also reported in several studies in both physiological and  
21 pathological situations (65, 66). SNCA overexpression and its aggregated form have been shown to be  
22 involved in neurotoxicity (28, 66, 67). Our results demonstrate SNCA aggregation in the embryonic  
23 cerebellar culture of an E10 cerebellar primordium after 13 days *in vitro* (DIV 13), but not at DIV 6. The  
24 SNCA<sup>+</sup>/Otx2<sup>+</sup>/p75<sup>ntr+</sup> combination of neurons/fibers at the core of the cerebellar primordium showed an

1 unexpectedly activated CC3 that began from the mesencephalon and terminated at the midpoint of the  
2 rostrocaudal cerebellar primordium.

3         The transient presence of SNCA<sup>+</sup> cells in the core of the early cerebellar primordium suggests that  
4 they have a temporary regulatory role between the rostradorsal and caudoventral domains in the  
5 developing cerebellum. The neuronal fibers probably originate from early CN neurons or from pioneer  
6 axons that originate from the trigeminal nerve with or without synapses containing SNCA<sup>+</sup>/*Otx2*<sup>+</sup> cells  
7 that terminate on the subpial surface at the point that rhombic lip-derived *Lmx1a*<sup>+</sup> CN changes direction  
8 from tangential migration to approximately radial migration. Therefore, it may provide a substrate  
9 pathway that directs the *Lmx1*<sup>+</sup> cells to migrate to their destination in the NTZ. Given that rhombic lip-  
10 derived *Lmx1a*<sup>+</sup> neuron migration to the NTZ is paved by pioneer neural fibers, they are expected to  
11 disappear soon after migration because CC3 is highly expressed and these CC3<sup>+</sup> fibers may play a part in  
12 axonal guidance and neuronal migration during early cerebellar development. However, this set of pioneer  
13 neural fibers persists and can be traced up to the perinatal period of cerebellar development. Thus, this set  
14 of pioneer neural fibers may have dual functions, and its second role probably points to the midway  
15 position of subpial termination and indicates the putative lobule VI/VII at the paramedian sulcus. The  
16 significance of this termination around the perinatal period at the paramedian sulcus probably causes an  
17 area with no cerebellar cortex, known as an acortical area, in some adult cerebelli, such as in the bat (68)  
18 and the naked mole rat (69). However, this does not happen for all species (e.g. mouse (40)). It is not clear  
19 whether the presence of this set of fibers until around the perinatal period is involved in acortical area  
20 formation in paramedian sulcus in the cerebellum. Finally, the prominent presence of early combinations  
21 of neurons/fibers may indicate an organizing center at the cerebellar primordium core, and continuation  
22 neuronal fibers could be a landmark for anterior and posterior development.

23  
24  
25

## 1 **Conclusion**

2           Our study suggests that a subset of CN neurons that is *SNCA<sup>+</sup>/Otx2<sup>+</sup>/p75ntr<sup>+</sup>* originates from the  
3 mesencephalic neural crest, which is a possible new germinal zone for cerebellar development. We  
4 showed that this subset of the CN neurons accompanies nerve fibers that are temporarily present at the  
5 core cerebellar primordium and terminates at the midway of the rostrocaudal subpial surface. This  
6 suggests that they play a role as a secondary organizer that may act as a transient signaling center. This  
7 center probably directs rhombic-derived cells to the NTZ and also organizes the cerebellum into anterior  
8 and posterior divisions at the level of lobule VI/VII. We are only beginning to understand the role of  
9 mesencephalic-derived CN neurons that accompany the neuronal fibers at the core of the cerebellar  
10 primordium, and further studies are required to determine the precise molecular mechanism and functional  
11 significance of this putative transient center.

12

13

14

15

16

17

18

19

20

21

22

23

24

1

2 **Acknowledgements:**

3 These studies were supported by grant from the Natural Sciences and Engineering Research Council

4 (HM)

5

6

7

8

9

1 **REFERENCES**

- 2
- 3 1. Glickstein M, Strata P, Voogd J. Cerebellum: history. *Neuroscience*. 2009;162(3):549-59.
- 4 2. Thach W. On the mechanism of cerebellar contributions to cognition. *The Cerebellum*.
- 5 2007;6(3):163-7.
- 6 3. Voogd J, Glickstein M. The anatomy of the cerebellum. *Trends in cognitive sciences*.
- 7 1998;2(9):307-13.
- 8 4. Strick PL, Dum RP, Fiez JA. Cerebellum and nonmotor function. *Annual review of*
- 9 *neuroscience*. 2009;32:413-34.
- 10 5. Ivry RB. The representation of temporal information in perception and motor control. *Current*
- 11 *opinion in neurobiology*. 1996;6(6):851-7.
- 12 6. Voogd J, Ruigrok T. Transverse and longitudinal patterns in the mammalian cerebellum.
- 13 *Progress in brain research*. 1997;114:21-37.
- 14 7. Marzban H, Del Bigio MR, Alizadeh J, Ghavami S, Zachariah RM, Rastegar M. Cellular
- 15 commitment in the developing cerebellum. *Frontiers in cellular neuroscience*. 2015;8:450.
- 16 8. Goldowitz D, Hamre K. The cells and molecules that make a cerebellum. *Trends in*
- 17 *neurosciences*. 1998;21(9):375-82.
- 18 9. Sotelo C. Cellular and genetic regulation of the development of the cerebellar system. *Progress*
- 19 *in neurobiology*. 2004;72(5):295-339.
- 20 10. Wang VY, Zoghbi HY. Genetic regulation of cerebellar development. *Nature Reviews*
- 21 *Neuroscience*. 2001;2(7):484-91.
- 22 11. Fink AJ, Englund C, Daza RA, Pham D, Lau C, Nivison M, et al. Development of the deep
- 23 cerebellar nuclei: transcription factors and cell migration from the rhombic lip. *The Journal of*
- 24 *neuroscience*. 2006;26(11):3066-76.

- 1 12. Green MJ, Wingate RJ. Developmental origins of diversity in cerebellar output nuclei. *Neural*  
2 *development*. 2014 Jan 09;9:1. PubMed PMID: 24405572. Pubmed Central PMCID: 3929244.
- 3 13. Stainier D, Gilbert W. The monoclonal antibody B30 recognizes a specific neuronal cell surface  
4 antigen in the developing mesencephalic trigeminal nucleus of the mouse. *The Journal of neuroscience*.  
5 1989;9(7):2468-85.
- 6 14. Rahimi-Balaei M, Afsharinezhad P, Bailey K, Buchok M, Yeganeh B, Marzban H. Embryonic  
7 stages in cerebellar afferent development. *Cerebellum & ataxias*. 2015;2(1):1.
- 8 15. Jacobson M. *Developmental neurobiology*: Springer Science & Business Media; 2013.
- 9 16. Narayanan CH, Narayanan Y. Determination of the embryonic origin of the mesencephalic  
10 nucleus of the trigeminal nerve in birds. *Journal of embryology and experimental morphology*. 1978  
11 Feb;43:85-105. PubMed PMID: 632745.
- 12 17. Lee VM, Sechrist JW, Bronner-Fraser M, Nishi R. Neuronal differentiation from postmitotic  
13 precursors in the ciliary ganglion. *Developmental biology*. 2002;252(2):312-23.
- 14 18. Schwarz Q, Vieira JM, Howard B, Eickholt BJ, Ruhrberg C. Neuropilin 1 and 2 control cranial  
15 gangliogenesis and axon guidance through neural crest cells. *Development (Cambridge, England)*.  
16 2008;135(9):1605-13.
- 17 19. Jiang X, Gweye Y, McKeown SJ, Bronner-Fraser M, Lutzko C, Lawlor ER. Isolation and  
18 characterization of neural crest stem cells derived from in vitro–differentiated human embryonic stem  
19 cells. *Stem cells and development*. 2008;18(7):1059-71.
- 20 20. Bernabeu RO, Longo FM. The p75 neurotrophin receptor is expressed by adult mouse dentate  
21 progenitor cells and regulates neuronal and non-neuronal cell genesis. *BMC neuroscience*. 2010;11(1):1.
- 22 21. Dechant G, Barde Y-A. The neurotrophin receptor p75NTR: novel functions and implications for  
23 diseases of the nervous system. *Nature neuroscience*. 2002;5(11):1131-6.

- 1 22. Kurokawa D, Kiyonari H, Nakayama R, Kimura-Yoshida C, Matsuo I, Aizawa S. Regulation of  
2 Otx2 expression and its functions in mouse forebrain and midbrain. *Development* (Cambridge,  
3 England). 2004;131(14):3319-31.
- 4 23. Kimura C, Takeda N, Suzuki M, Oshimura M, Aizawa S, Matsuo I. Cis-acting elements  
5 conserved between mouse and pufferfish Otx2 genes govern the expression in mesencephalic neural  
6 crest cells. *Development* (Cambridge, England). 1997;124(20):3929-41.
- 7 24. Hagan N, Zervas M. Wnt1 expression temporally allocates upper rhombic lip progenitors and  
8 defines their terminal cell fate in the cerebellum. *Molecular and cellular neurosciences*. 2012  
9 Feb;49(2):217-29. PubMed PMID: 22173107. Pubmed Central PMCID: 3351839.
- 10 25. Chizhikov V, Steshina E, Roberts R, Ilkin Y, Washburn L, Millen KJ. Molecular definition of an  
11 allelic series of mutations disrupting the mouse Lmx1a (dreher) gene. *Mammalian genome*.  
12 2006;17(10):1025-32.
- 13 26. Chizhikov VV, Lindgren AG, Mishima Y, Roberts RW, Aldinger KA, Miesegaes GR, et al.  
14 Lmx1a regulates fates and location of cells originating from the cerebellar rhombic lip and telencephalic  
15 cortical hem. *Proceedings of the National Academy of Sciences*. 2010;107(23):10725-30.
- 16 27. Nichols DH, Bruce LL. Migratory routes and fates of cells transcribing the Wnt-1 gene in the  
17 murine hindbrain. *Developmental dynamics*. 2006;235(2):285-300.
- 18 28. Zhong SC, Luo X, Chen XS, Cai QY, Liu J, Chen XH, et al. Expression and subcellular location  
19 of alpha-synuclein during mouse-embryonic development. *Cell Mol Neurobiol*. 2010 Apr;30(3):469-82.  
20 PubMed PMID: 19885730. Epub 2009/11/04. eng.
- 21 29. Vekrellis K, Rideout HJ, Stefanis L. Neurobiology of alpha-synuclein. *Mol Neurobiol*. 2004  
22 Aug;30(1):1-21. PubMed PMID: 15247485. Epub 2004/07/13. eng.



- 1 30. Esposito A, Dohm CP, Kermer P, Bahr M, Wouters FS. alpha-Synuclein and its disease-related  
2 mutants interact differentially with the microtubule protein tau and associate with the actin cytoskeleton.  
3 *Neurobiol Dis.* 2007 Jun;26(3):521-31. PubMed PMID: 17408955. Epub 2007/04/06. eng.
- 4 31. Rogers D, Schor NF. The child is father to the man: developmental roles for proteins of  
5 importance for neurodegenerative disease. *Annals of neurology.* 2010;67(2):151-8.
- 6 32. Zylka MJ, Sowa NA, Taylor-Blake B, Twomey MA, Herrala A, Voikar V, et al. Prostatic acid  
7 phosphatase is an ectonucleotidase and suppresses pain by generating adenosine. *Neuron.*  
8 2008;60(1):111-22.
- 9 33. Hokin MR, Hokin LE. The synthesis of phosphatidic acid from diglyceride and adenosine  
10 triphosphate in extracts of brain microsomes. *Journal of Biological Chemistry.* 1959;234(6):1381-6.
- 11 34. Bailey K, Balaei MR, Mannan A, Del Bigio MR, Marzban H. Purkinje cell compartmentation in  
12 the cerebellum of the lysosomal Acid phosphatase 2 mutant mouse (nax-naked-ataxia mutant mouse).  
13 *PloS one.* 2014;9(4):e94327.
- 14 35. Bailey K, Balaei MR, Mehdizadeh M, Marzban H. Spatial and temporal expression of lysosomal  
15 acid phosphatase 2 (ACP2) reveals dynamic patterning of the mouse cerebellar cortex. *The Cerebellum.*  
16 2013;12(6):870-81.
- 17 36. Rahimi Balaei M, Jiao X, Ashtari N, Afsharinezhad P, Ghavami S, Marzban H. Cerebellar  
18 Expression of the Neurotrophin Receptor p75 in Naked-Ataxia Mutant Mouse. *International journal of*  
19 *molecular sciences.* 2016;17(1):115.
- 20 37. Sillitoe RV, Hawkes R. Whole-mount immunohistochemistry: a high-throughput screen for  
21 patterning defects in the mouse cerebellum. *The journal of histochemistry and cytochemistry : official*  
22 *journal of the Histochemistry Society.* 2002 Feb;50(2):235-44. PubMed PMID: 11799142.
- 23 38. Marzban H, Hawkes R. Fibroblast growth factor promotes the development of deep cerebellar  
24 nuclear neurons in dissociated mouse cerebellar cultures. *Brain research.* 2007;1141:25-36.

- 1 39. Marzban H, Khanzada U, Shabir S, Hawkes R, Langnaese K, Smalla KH, et al. Expression of the  
2 immunoglobulin superfamily neuroplastin adhesion molecules in adult and developing mouse  
3 cerebellum and their localisation to parasagittal stripes. *Journal of Comparative Neurology*.  
4 2003;462(3):286-301.
- 5 40. Marzban H, Kim C-T, Doorn D, Chung S-H, Hawkes R. A novel transverse expression domain  
6 in the mouse cerebellum revealed by a neurofilament-associated antigen. *Neuroscience*.  
7 2008;153(4):1190-201.
- 8 41. Stainier D, Gilbert W. Pioneer neurons in the mouse trigeminal sensory system. *Proceedings of*  
9 *the National Academy of Sciences*. 1990;87(3):923-7.
- 10 42. Tomellini E, Lagadec C, Polakowska R, Le Bourhis X. Role of p75 neurotrophin receptor in  
11 stem cell biology: more than just a marker. *Cellular and molecular life sciences*. 2014;71(13):2467-81.
- 12 43. Young H, Ciampoli D, Hsuan J, Canty A. Expression of Ret-, p75NTR-, Phox2a-, Phox2b-, and  
13 tyrosine hydroxylase-immunoreactivity by undifferentiated neural crest-derived cells and different  
14 classes of enteric neurons in the embryonic mouse gut. *Developmental dynamics*. 1999;216(2):137-52.
- 15 44. Martin-Zanca D, Barbacid M, Parada LF. Expression of the trk proto-oncogene is restricted to  
16 the sensory cranial and spinal ganglia of neural crest origin in mouse development. *Genes &*  
17 *Development*. 1990;4(5):683-94.
- 18 45. Harris ML, Erickson CA. Lineage specification in neural crest cell pathfinding. *Developmental*  
19 *Dynamics*. 2007;236(1):1-19.
- 20 46. Wehrman T, He X, Raab B, Dukipatti A, Blau H, Garcia KC. Structural and mechanistic insights  
21 into nerve growth factor interactions with the TrkA and p75 receptors. *Neuron*. 2007 Jan 4;53(1):25-38.  
22 PubMed PMID: 17196528.

- 1 47. Nah J, Yuan J, Jung YK. Autophagy in neurodegenerative diseases: from mechanism to  
2 therapeutic approach. *Molecules and cells*. 2015 May;38(5):381-9. PubMed PMID: 25896254. Pubmed  
3 Central PMCID: 4443278.
- 4 48. Ben-Arie N, Bellen HJ, Armstrong DL, McCall AE, Gordadze PR, Guo Q, et al. Math1 is  
5 essential for genesis of cerebellar granule neurons. *Nature*. 1997 Nov 13;390(6656):169-72. PubMed  
6 PMID: 9367153.
- 7 49. Machold R, Fishell G. Math1 is expressed in temporally discrete pools of cerebellar rhombic-lip  
8 neural progenitors. *Neuron*. 2005 Oct 6;48(1):17-24. PubMed PMID: 16202705.
- 9 50. Manto M, Gruol DL, Schmahmann JD, Koibuchi N, Rossi F. *Handbook of the cerebellum and*  
10 *cerebellar disorders*. New York: Springer; 2012.
- 11 51. Simeone A, Acampora D, Gulisano M, Stornaiuolo A, Boncinelli E. Nested expression domains  
12 of four homeobox genes in developing rostral brain. *Nature*. 1992 Aug 20;358(6388):687-90. PubMed  
13 PMID: 1353865.
- 14 52. Alvarado-Mallart RM. The chick/quail transplantation model: discovery of the isthmic organizer  
15 center. *Brain research Brain research reviews*. 2005 Sep;49(2):109-13. PubMed PMID: 16111542.
- 16 53. Li JY, Joyner AL. Otx2 and Gbx2 are required for refinement and not induction of mid-  
17 hindbrain gene expression. *Development*. 2001;128(24):4979-91.
- 18 54. Joyner AL, Liu A, Millet S. Otx2, Gbx2 and Fgf8 interact to position and maintain a mid-  
19 hindbrain organizer. *Current opinion in cell biology*. 2000;12(6):736-41.
- 20 55. Li JY, Lao Z, Joyner AL. New regulatory interactions and cellular responses in the isthmic  
21 organizer region revealed by altering Gbx2 expression. *Development (Cambridge, England)*. 2005  
22 Apr;132(8):1971-81. PubMed PMID: 15790971. Epub 2005/03/26. eng.
- 23 56. Lumsden A, Sprawson N, Graham A. Segmental origin and migration of neural crest cells in the  
24 hindbrain region of the chick embryo. *Development*. 1991;113(4):1281-91.

- 1 57. Baker C, Bronner-Fraser M, Le Douarin NM, Teillet M-A. Early-and late-migrating cranial  
2 neural crest cell populations have equivalent developmental potential in vivo. *Development*.  
3 1997;124(16):3077-87.
- 4 58. Chai Y, Jiang X, Ito Y, Bringas P, Jr., Han J, Rowitch DH, et al. Fate of the mammalian cranial  
5 neural crest during tooth and mandibular morphogenesis. *Development*. 2000 Apr;127(8):1671-9.  
6 PubMed PMID: 10725243.
- 7 59. Bronner ME, LeDouarin NM. Development and evolution of the neural crest: an overview.  
8 *Developmental biology*. 2012 Jun 1;366(1):2-9. PubMed PMID: 22230617. Pubmed Central PMCID:  
9 3351559.
- 10 60. Sauka-Spengler T, Meulemans D, Jones M, Bronner-Fraser M. Ancient evolutionary origin of  
11 the neural crest gene regulatory network. *Developmental cell*. 2007 Sep;13(3):405-20. PubMed PMID:  
12 17765683.
- 13 61. Mayor R, Theveneau E. The neural crest. *Development*. 2013 Jun;140(11):2247-51. PubMed  
14 PMID: 23674598.
- 15 62. Forni PE, Wray S. Neural crest and olfactory system: new prospective. *Molecular neurobiology*.  
16 2012 Oct;46(2):349-60. PubMed PMID: 22773137. Pubmed Central PMCID: 3586243.
- 17 63. Katoh H, Shibata S, Fukuda K, Sato M, Satoh E, Nagoshi N, et al. The dual origin of the  
18 peripheral olfactory system: placode and neural crest. *Molecular brain*. 2011;4:34. PubMed PMID:  
19 21943152. Pubmed Central PMCID: 3215936.
- 20 64. Schneider BL, Seehus CR, Capowski EE, Aebischer P, Zhang SC, Svendsen CN. Over-  
21 expression of alpha-synuclein in human neural progenitors leads to specific changes in fate and  
22 differentiation. *Human molecular genetics*. 2007 Mar 15;16(6):651-66. PubMed PMID: 17309880.

- 1 65. Specht CG, Tigaret CM, Rast GF, Thalhammer A, Rudhard Y, Schoepfer R. Subcellular  
2 localisation of recombinant alpha- and gamma-synuclein. *Molecular and cellular neurosciences*. 2005  
3 Feb;28(2):326-34. PubMed PMID: 15691713.
- 4 66. Kontopoulos E, Parvin JD, Feany MB. Alpha-synuclein acts in the nucleus to inhibit histone  
5 acetylation and promote neurotoxicity. *Human molecular genetics*. 2006 Oct 15;15(20):3012-23.  
6 PubMed PMID: 16959795.
- 7 67. Azeredo da Silveira S, Schneider BL, Cifuentes-Diaz C, Sage D, Abbas-Terki T, Iwatsubo T, et  
8 al. Phosphorylation does not prompt, nor prevent, the formation of alpha-synuclein toxic species in a rat  
9 model of Parkinson's disease. *Human molecular genetics*. 2009 Mar 1;18(5):872-87. PubMed PMID:  
10 19074459.
- 11 68. Kim JY, Marzban H, Chung SH, Watanabe M, Eisenman LM, Hawkes R. Purkinje cell  
12 compartmentation of the cerebellum of microchiropteran bats. *Journal of Comparative Neurology*.  
13 2009;517(2):193-209.
- 14 69. Marzban H, Hoy N, Aavani T, Sarko DK, Catania KC, Hawkes R. Compartmentation of the  
15 cerebellar cortex in the naked mole-rat (*Heterocephalus glaber*). *The Cerebellum*. 2011;10(3):435-48.  
16  
17  
18  
19  
20  
21  
22  
23  
24  
25  
26

1 **FIGURES**

2

3 **Fig. 1. Cerebellar primordium immunostained with NAA and SNCA shows that a subset of neurons**  
4 **is present at the rostral end of cerebellum at E9**

5 **A.** Dorsal view of the schematic illustration of the cerebellar primordium, mesencephalon, isthmus, and  
6 4th ventricle. The red line shows the sagittal plane about which the section shown in B–D was taken.

7 **B–D.** Sagittal section through the cerebellar primordium at early stage E9. Immunoperoxidase-stained with  
8 NAA 3A10 shows the presence of neurons in the cerebellar primordium that crosses the isthmus (i) and  
9 continues to the mesencephalon. **C.** A higher magnification of **B.** **D.** Differentiated neurons at E9 are  
10 visible; a higher magnification is shown in the inset, **d.**

11 **E–F.** Sagittal section through the cerebellar primordium at late E9. Immunofluorescence staining of  
12 SNCA shows SNCA<sup>+</sup> (green) CN neurons in the mesencephalon, at the isthmus (i) and in the rostral part  
13 of cerebellar primordium (cb). **F.** A higher magnification of **E.**

14 Abbreviations: 4thv, 4th ventricle; cb, cerebellum; i, isthmus; m, mesencephalon; r, rostral; c, caudal; d,  
15 dorsal; v, ventral

16 Scale bar, 100 μm in B; 50 μm in C, E; and 20 μm in D

17

18

19 **Fig. 2. Sagittal section through the cerebellar primordium at E12 double immunofluorescence**  
20 **stained with SNCA and *Lmx1a* at medial (A–D) and lateral (E–H) sections**

21 **A–G.** SNCA (green, A and E) and *Lmx1a* (red, B and F) immunopositive cells are located at a CN neuron  
22 temporary site called the NTZ. The SNCA<sup>+</sup> cells continue to the mesencephalon and *Lmx1a*<sup>+</sup> cells continue  
23 to the rhombic lip. Merged images show that the SNCA<sup>+</sup> form a population of CN neurons distinct from

1 the rhombic lip-derived cells (*Lmx1a*<sup>+</sup>) in NTZ (C and G). D and H show a higher magnification of C and  
2 G, respectively.

3 Abbreviations: 4thV, 4th ventricle; cb, cerebellum; i, isthmus; m, mesencephalon; rl, rhombic lip; r,  
4 rostral; c, caudal; d, dorsal; v, ventral

5 Scale bar, 100  $\mu$ m

6

7

8 **Fig. 3. Sagittal section through the cerebellar primordium at E 12, peroxidase immunostained by**  
9 ***Otx2***

10 **A–D.** Sagittal section through medial (A) and lateral (C) cerebellar primordium show high *Otx2*  
11 immunoreactivity at the mesencephalon and a few *Otx2*<sup>+</sup> cells cross the isthmus and position at the rostral  
12 part of cerebellar primordium at the NTZ. The boxed regions in **A** (a) and **C** (b) are shown at higher  
13 magnification in **B** and **D**, respectively.

14 Abbreviations: 4thv, 4th ventricle; i, isthmus; m, mesencephalon; rl, rhombic lip

15 Scale bar, 200  $\mu$ m in A, C; 50  $\mu$ m in D, B

16

17

18 **Fig. 4. Sagittal section through the cerebellar primordium at E12 double immunofluorescence**  
19 **stained with SNCA and *Otx2* in section and primary cerebellar culture**

20 **A–E.** Double immunostaining of SNCA (green) and *Otx2* (red) on the sagittal section of the cerebellar  
21 primordium at E12. **A.** High *Otx2* immunoreactivity in the mesencephalon. SNCA<sup>+</sup> cells in the  
22 mesencephalon accompany *Otx2*<sup>+</sup> cells cross the isthmus (i) and enter the NTZ. **B.** higher magnification  
23 of **A.** **C–E.** Immunostaining with SNCA (green, **C**) and *Otx2* (red, **D**) and merged (**E**) shows co-expression  
24 in the NTZ.

1 **F–H.** Primary dissociated cerebellar culture obtained at E10, DIV 4 shows co-expression of SNCA<sup>+</sup> cells  
2 with *Otx2*.

3 Abbreviations: 4thv, 4th ventricle; CB, cerebellum; i, isthmus; m, mesencephalon; rl, rhombic lip; NTZ,  
4 nuclear transitory zone

5 Scale bar, 200 μm in A; 50 μm in B, F, G, H; 20 μm in C, D, E

6  
7  
8  
9  
10  
11  
12

13 **Fig. 5.** Expression patterns of *Otx2*, *Wnt1*, and *Fgf8* ligands at E12 mouse cerebellum evaluated by RNA  
14 *in situ* hybridization (RNAscope). *In situ* hybridization of all ligands (*Otx2* red, *Wnt1* yellow, and *Fgf8*  
15 green) on embryo sections from CD1 mice.

16 **A–C)** Merged channels of the *in situ* hybridization of all ligands; *Otx2*, *Wnt1*, and *Fgf8* mRNA probe at  
17 low (A) and high (B) magnification, and image captured by confocal microscopy (C).

18 **D)** *Otx2* mRNA signal is strong in the mesencephalon and extend as tail to the rostral cerebellar  
19 primordium in NTZ.

20 **E)** *Wnt1* mRNA signal is highest in the mesencephalon and extend isthmus and as tail to the rostral  
21 cerebellar primordium in NTZ.

22 **F)** *Fgf8* mRNA signal is present in scattered cells at the rostral cerebellar primordium in NTZ.

23 **G)** Panels D, E, F are merged in (G) and blue signal is staining with DAPI.

24 Abbreviation; cb, cerebellum; m, mesencephalon; NTZ, nuclear transitory zone

25 Scale bar: 100 μm in A, 20 μm in B, C; 50 μm in D–G

26  
27  
28  
29  
30  
31  
32



1 **Fig. 6. Fast DiI applied to embryo at E9 and maintained in place for 4 days *in vitro* (DIV 4).**

2  
3 **A, a.** Fast DiI inserted in mesencephalon at E9 (DIV 0), arrow shows inserted location of DiI crystal in  
4 mesencephalon and arrowhead indicate isthmus.

5 **B-C.** DiI positive cells directed rostral to mesencephalon (B) and caudally to rostral cerebellar primordium  
6 (C).

7 **D-F.** low and high magnification shows few cells in the rostral cerebellar primordium in NTZ at level of  
8 medial cerebellar section.

9 **G-I.** low and high magnification shows few cells in the rostral cerebellar primordium in NTZ  
10 at level of lateral cerebellar section.

11 Abbreviations: cb, cerebellum; m, mesencephalon; NTZ, nuclear transitory zone

12 Scale bar: 500  $\mu\text{m}$  in a; 200  $\mu\text{m}$  in A; 100  $\mu\text{m}$  in B-D, and G; 50  $\mu\text{m}$  in E, H; 20  $\mu\text{m}$  in F,I

13

14

15

16 **Fig. 7. Fast DiI applied to embryo at E9 and removed after 24 hrs.**

17

18 **A, a.** Fast DiI inserted in mesencephalon at E9 (DIV 0) (indicated by arrowhead) and arrow shows the  
19 isthmus.

20 **B.** DiI positive cells present in cerebellar primordium after DIV 6.

21 **C-D, d.** A higher magnification from the caudal to mesencephalon and rostral rhombencephalon shows  
22 DiI positive cells in cerebellar primordium

23 **E-G.** low and high magnification shows clearly cells with DiI staining in the rostral cerebellar primordium  
24 in NTZ after whole mount IHC with NAA and sectioning.

25 Abbreviations: cb, cerebellum; m, mesencephalon

26 Scale bar: 500  $\mu\text{m}$  in a, B; 250  $\mu\text{m}$  in A; 200  $\mu\text{m}$  in E; 100  $\mu\text{m}$  in C, D,F; 50  $\mu\text{m}$  in G.

27

28

29

1  
2 **Fig. 8. Sagittal section through cerebellar primordium at E10, double immunofluorescence stained**  
3 **with SNCA and P75ntr**

4 **A–C, H.** Double immunofluorescence stained with SNCA (**A**, green) and P75 (**B**, red) show co-labeled  
5 cells (**C**, merged) in the NTZ and a higher magnification for NTZ is shown in **H**.

6 **h.** Western blotting of SNCA and P75ntr expression during cerebellar development.

7 Immunoblots of total cerebella lysate from embryos at different embryonic days, E11, E13 and E15  
8 indicate an increase in expression of SNCA and P75ntr from E11 to E15. Protein loading was confirmed  
9 using  $\beta$ actin.

10 **D–G.** Primary dissociated cerebellar culture obtained from E10 mouse embryo, DIV 3, double  
11 immunofluorescence stained for SNCA (**D**: green) and P75ntr (**E**: red) and merged (**F**). **G** is a higher  
12 magnification of **F**; punctuate immunoreactivity of SNCA<sup>+</sup> cells is marked with arrow heads.

13 **I–K.** Double immunofluorescence staining of the E10 sagittal section for NAA 3A10 (green) and TrkA  
14 (red) shows TrkA immunoreactive cells located in the NTZ.

15 Abbreviations: cb, cerebellum; NTZ, nuclear transitory zone

16 Scale bar, 50  $\mu$ m in A–C and D–F; 20  $\mu$ m in H and 10  $\mu$ m in G

17

18

19 **Fig. 9. Sagittal section through cerebellar primordium at E12, double immunofluorescence stained**  
20 **with NAA 3A10 and P75ntr** (we used NAA to determine whether P75ntr fibers are nerve fibers)

21 **A–C, H.** Double immunofluorescence stained with NAA 3A10 (**A**; green) and P75 (**B**: red) show co-  
22 labeled cells and fibers (**C**; merged) in the NTZ and a higher magnification, shown in **H**, indicates the  
23 termination of fibers to the subpial surface in rostrocaudal midpoint of the cerebellar primordium.

24 **D–G.** Primary dissociated cerebellar culture at E10 mice embryo, after 21 days *in vitro* (DIV 21), double  
25 immunofluorescence stained for NAA (green) and P75ntr (red). Immunopositive neuronal somata and

1 axons shown with NAA 3A10 (**D**), while P75ntr (**E**) immunoreaction is localized in cell membrane that  
2 are merged in **F. G**. A higher magnification of panel **F**.

3 Abbreviations: cb= cerebellum, NTZ= nuclear transitory zone

4 Scale bar, 100  $\mu$ m in A–C; 50  $\mu$ m in H and 20  $\mu$ m in D–F

5  
6  
7  
8

9 **Fig. 10. Double immunostaining with SNCA and P75ntr at E10 and E12 shows a combination of**  
10 **neurons and fibers present at the core of cerebellar primordium**

11 **A–D**. Double immunostaining with SNCA (green) and P75ntr (red) at E10 shows more co-labelled cells  
12 at the caudal end of the NTZ (**D**, merged; arrow) that continue with fibers that terminate on the subpial  
13 surface at the rostrocaudal midpoint of the cerebellar primordium.

14 **E–H**. Double immunostaining with SNCA (green) and P75ntr (red) at E12 shows more co-labelled cells  
15 at the rostral end of the NTZ (**H**, merged).

16 Scale bar, 100  $\mu$ m in A,E; 50  $\mu$ m in B–D, F–H, I; 20  $\mu$ m in J–L

17  
18

19 **Fig. 11. SNCA peroxidase immunostaining at E14 and P4**

20 **A**. Sagittal section of cerebellar primordium at E14 immunostained with SNCA shown weak or lack of  
21 SNCA expression in somata.

22 **B, b**. are higher magnification for **A**.

23 **C**. A frontal section of the cerebellum at P4 with SNCA immunoperoxidase staining shows that there is  
24 no immunoreactivity in the cell body in all three cerebellar nuclei (CN); medial (m), interposed (i) and  
25 lateral (l), but it is present distinctly in the axon terminals.

26 **D, E**. are higher magnification for **A**.

1

2 Abbreviations: cn, cerebellar nuclei; h, hemisphere; i, interposed nucleus; l, lateral nucleus; m, medial  
3 nucleus; 4thv, fourth ventricle; v, vermis

4 Scale bar, 1000  $\mu\text{m}$  in A; 500  $\mu\text{m}$  in B

5

6

7 **Fig. 12. Lack of SNCA expression in the PAP mouse at E12**

8 A–F. Double immunostaining with SNCA (green) and P75<sup>ntr</sup> (red) at E12 in wildtype (A–C) and PAP-  
9 null mice (D–F) shows a lack of SNCA expression in NTZ cells (D), while P75<sup>ntr</sup> cells are present (E).

10 Abbreviations: cb, cerebellum; NTZ, nuclear transitory zone

11 Scale bar, 50  $\mu\text{m}$  in C and F

12

13

14

15 **Fig 13. Double immunofluorescence stained with SNCA (green) and *Lmx1a* (red) shows aggregation**  
16 **of SNCA in embryonic and cerebellar culture**

17 A–D. Primary dissociated cerebellar culture of E10 mice embryo after 5 days *in vitro* (DIV 5), double  
18 immunofluorescence-stained with SNCA and  $\beta$ tubulin, shows SNCA localization in cytoplasm and  
19 nucleus

20 E–G. Primary dissociated cerebellar culture of E10, after 6 days *in vitro* (DIV 6), double  
21 immunofluorescence-stained for SNCA (green; E) and *Lmx1a* (red; F), and merged in G. The normal  
22 appearance of SNCA<sup>+</sup> cells form a distinct population of CN neurons from the rhombic lip-derived cells  
23 (*Lmx1a*<sup>+</sup>) and are not overlapped.

1 **H–J.** Primary dissociated cerebellar culture of E10, after 13 days *in vitro* (DIV 13), double  
2 immunofluorescence-stained for SNCA (green; H) and *Lmx1a* (red; I), and merged in (J) shows  
3 aggregated form of SNCA in cell or cluster.

4 Scale bar, 50  $\mu$ m in E–G; 20  $\mu$ m in H–J

5

6

7 **Fig 14. Double immunostaining for SNCA (green) and cleaved caspase-3 (CC3, red) in the sagittal**  
8 **section of E12 embryo**

9 **A–D.** Double immunostaining for SNCA (green) and cleaved caspase-3 (CC3, red) in the sagittal section  
10 of the E12 embryo shows activation of caspase-3. This indicates dying cells during early cerebellar  
11 development. The boxed region in **A** is shown at higher magnification in **B** (SNCA) and **C** (CC3) and  
12 merged in **D**, shows activation of caspase-3 in neurons and fiber combinations in the core of the cerebellar  
13 primordium

14 **a.** Immunoblots of total caspase 3 and cleaved caspase 3 from cerebella lysate of the embryos at different  
15 embryonic days, E11, E13 and E15 indicate caspase 3 activation during early cerebellar development

16 **E–G.** The lateral aspect of the mouse embryo at E10, whole-mount IHC with NAA 3A10 showing outline  
17 of trigeminal ganglion. Double immunostaining for SNCA (green) and cleaved caspase-3 (cc3, red) at  
18 sagittal section of E12 embryo trigeminal ganglion shows activation of CC3 is almost localized in the  
19 ophthalmic division (op) of the trigeminal ganglion. The boxed region in F is shown at higher  
20 magnification in (G). Abbreviations: gg, geniculate ganglion; ntz, nuclear transitory zone; max, Maxillary  
21 division of trigeminal ganglion; man, mandibular division of trigeminal ganglion; ot, otocyst; rl, rhombic  
22 lip; vg, vestibular ganglion; tg, trigeminal ganglion; 4thV, fourth ventricle; r, rostral; c, caudal; d, dorsal;  
23 v, ventral

24 Scale bar: 50  $\mu$ m in A,F; 200  $\mu$ m in E; 20  $\mu$ m B–D, G

# Fig. 1

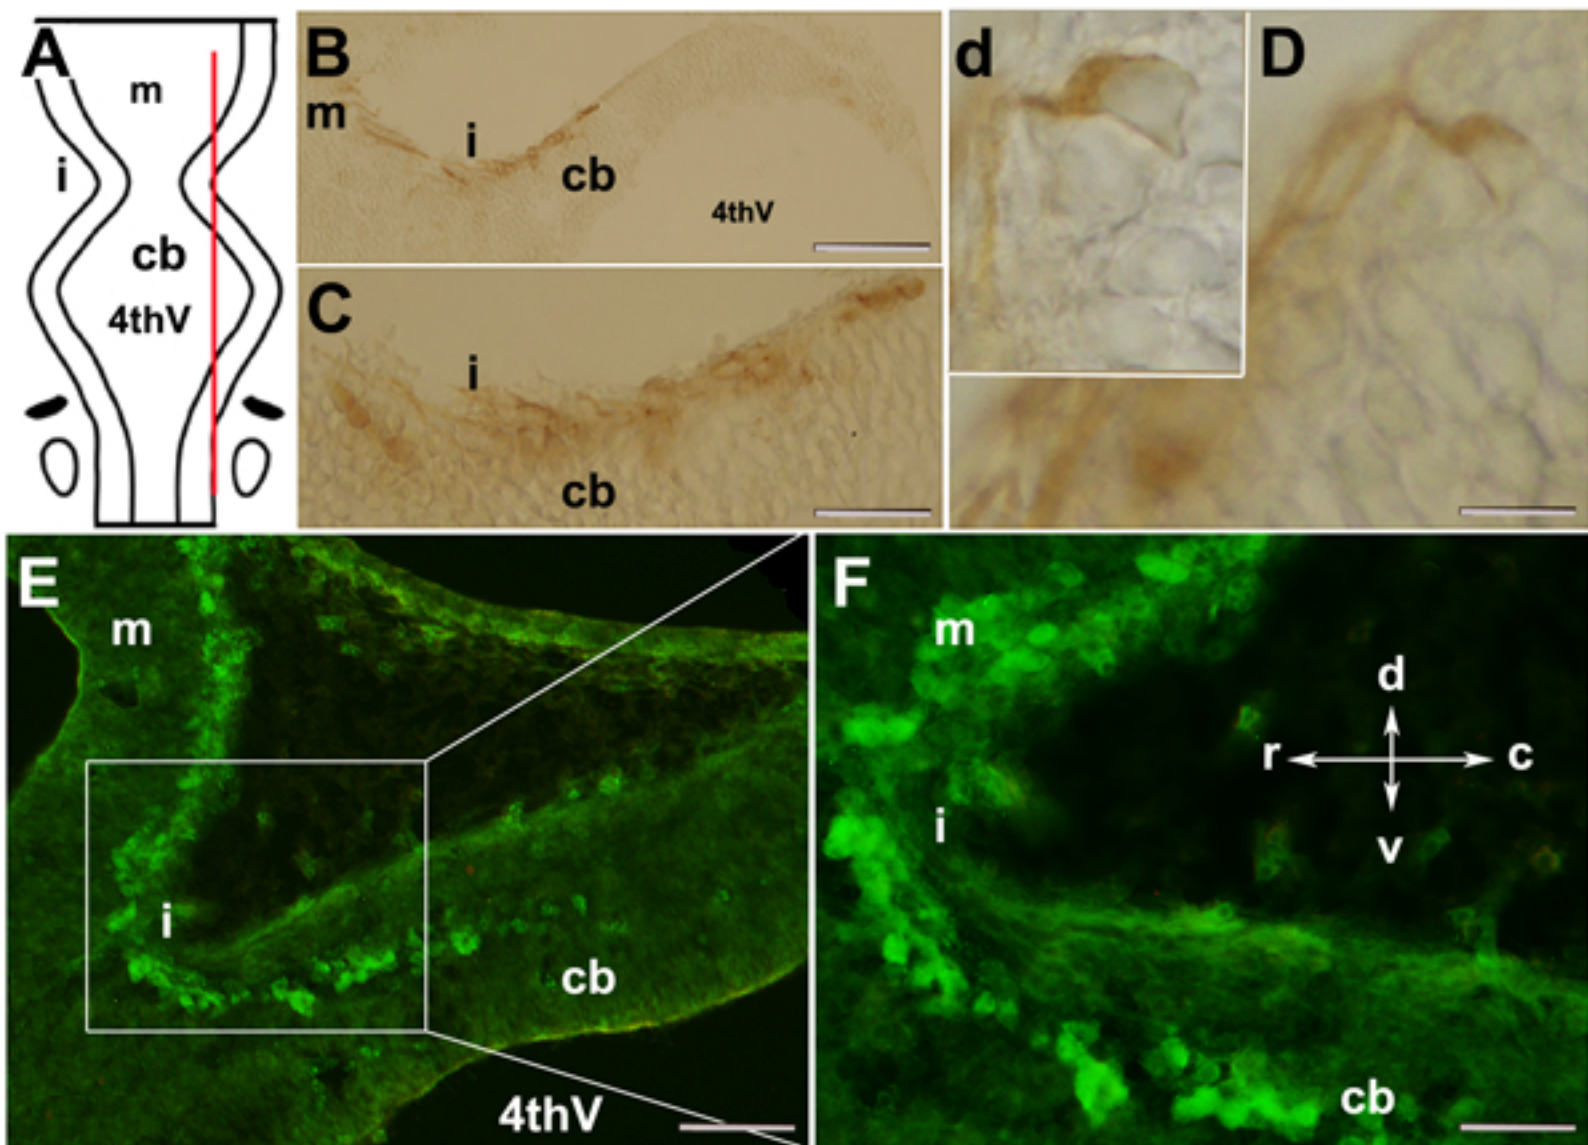

# Fig. 2

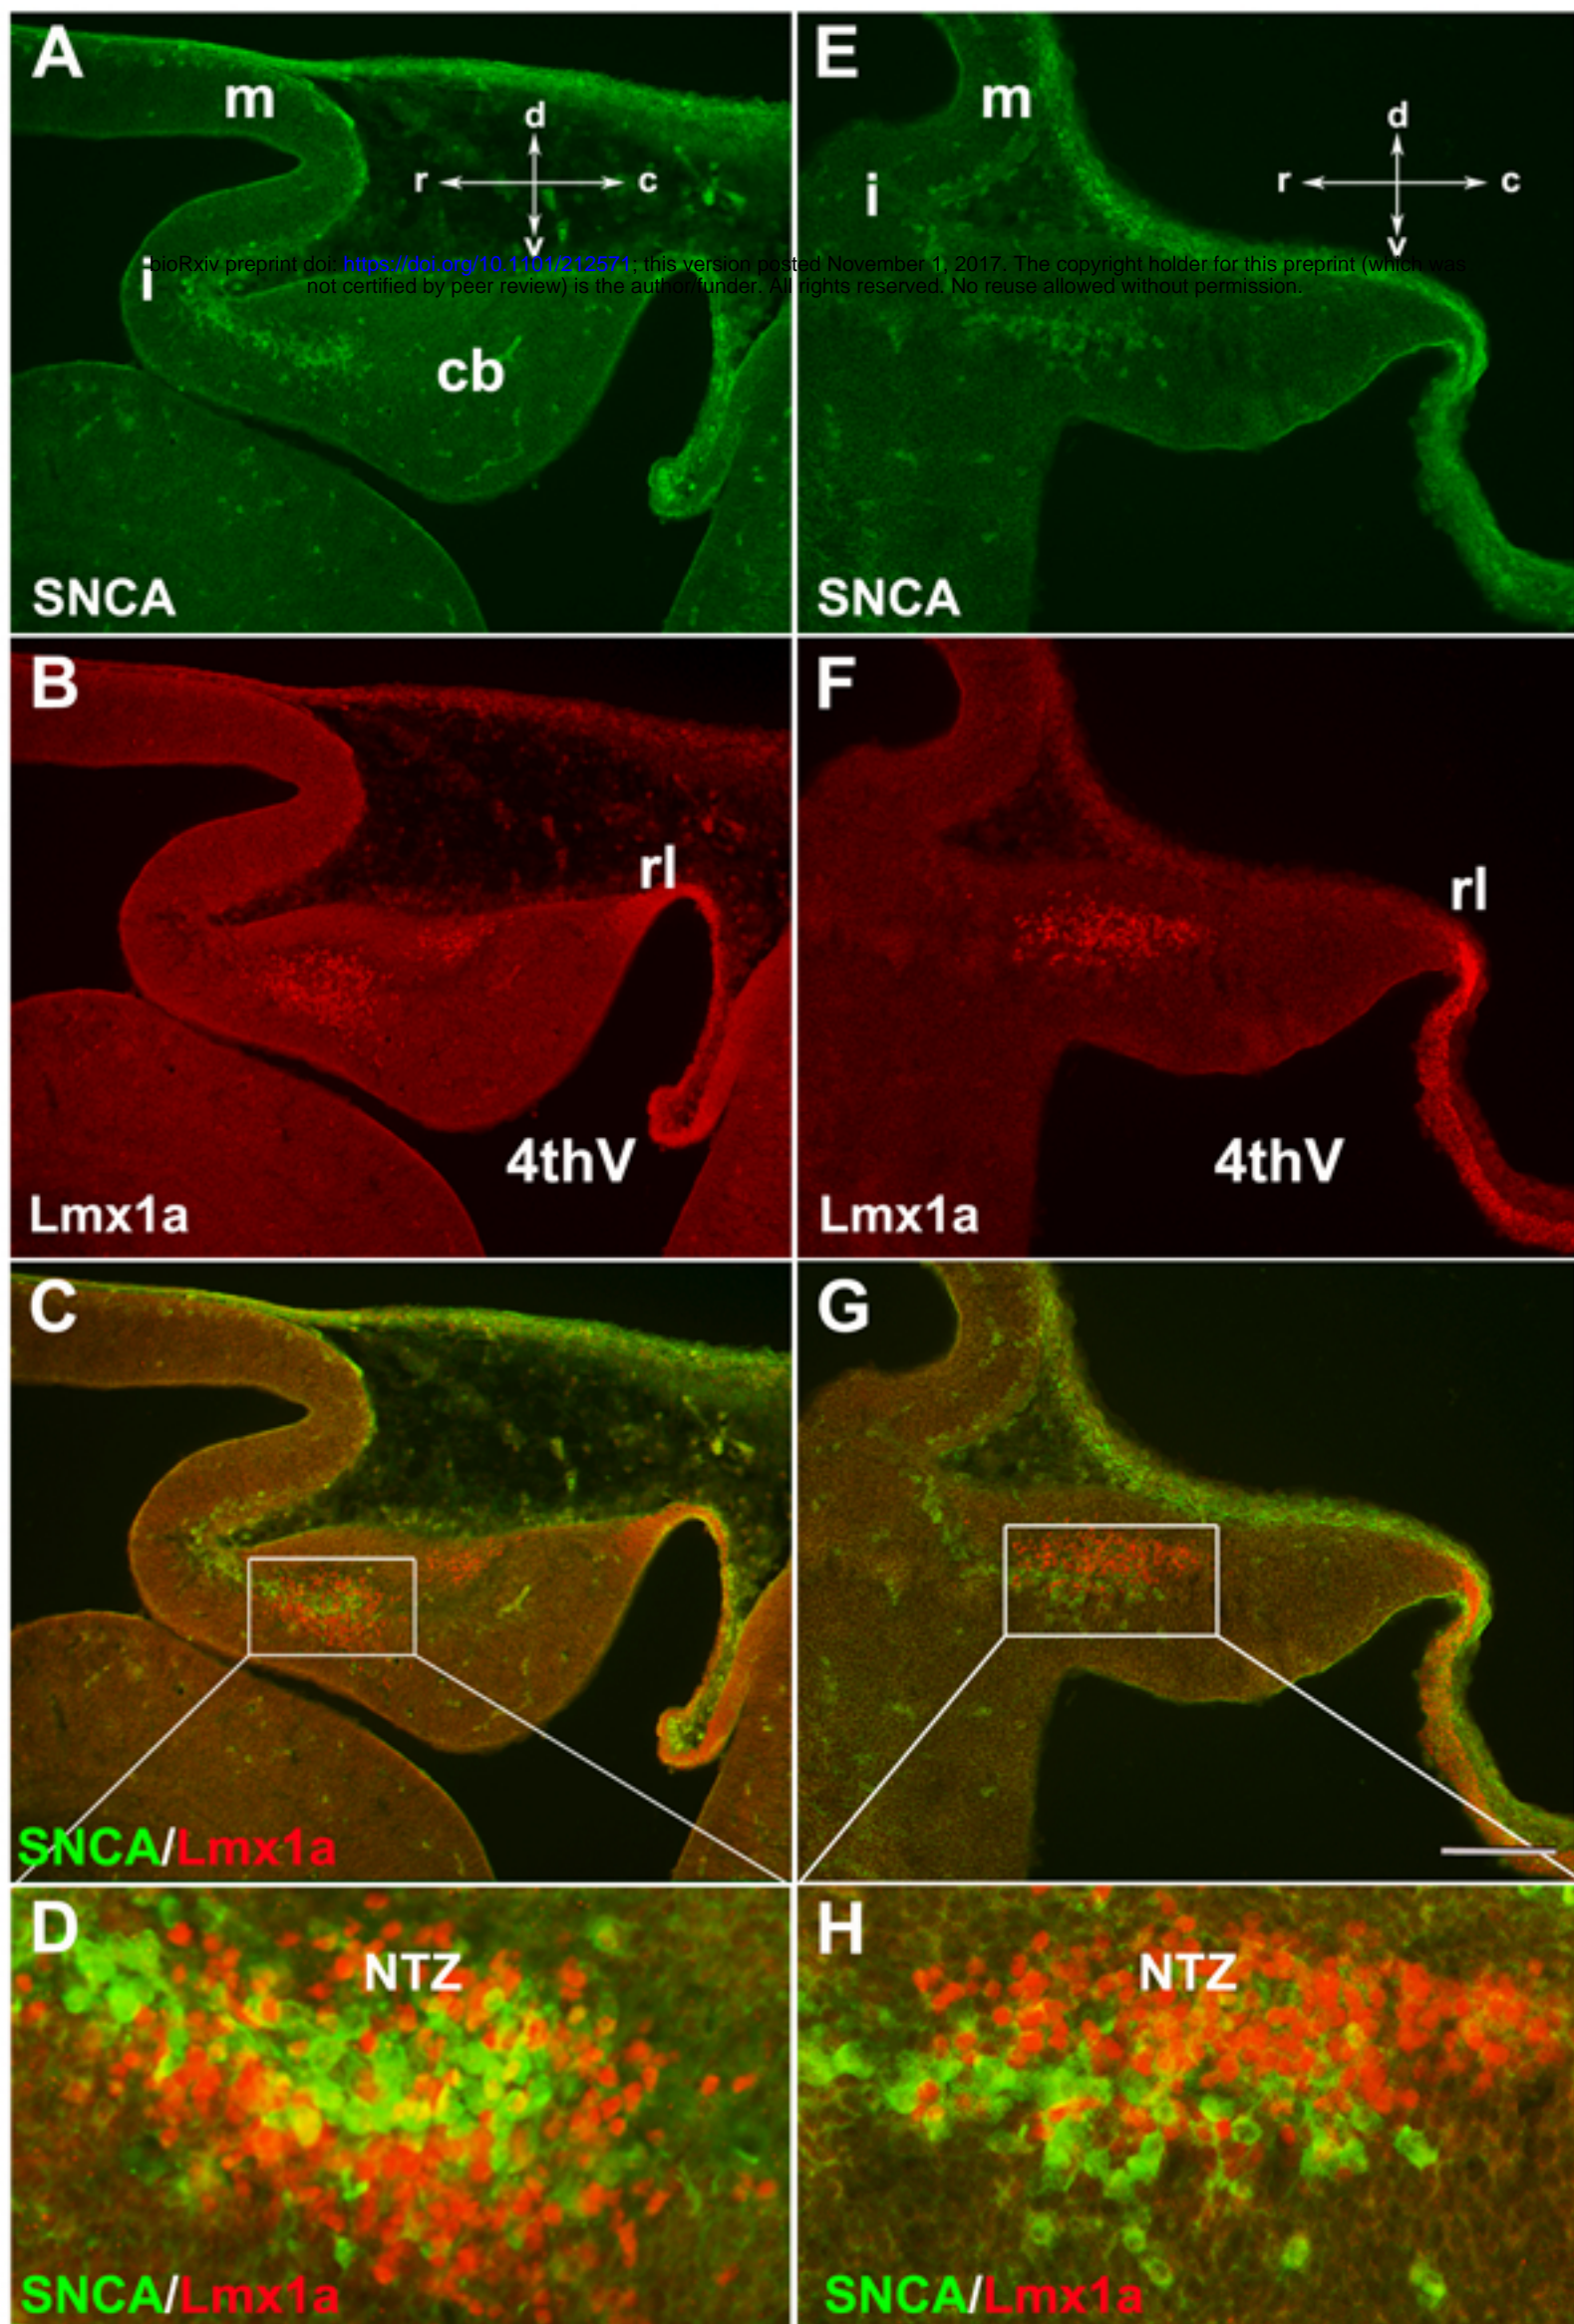

**Fig. 3**

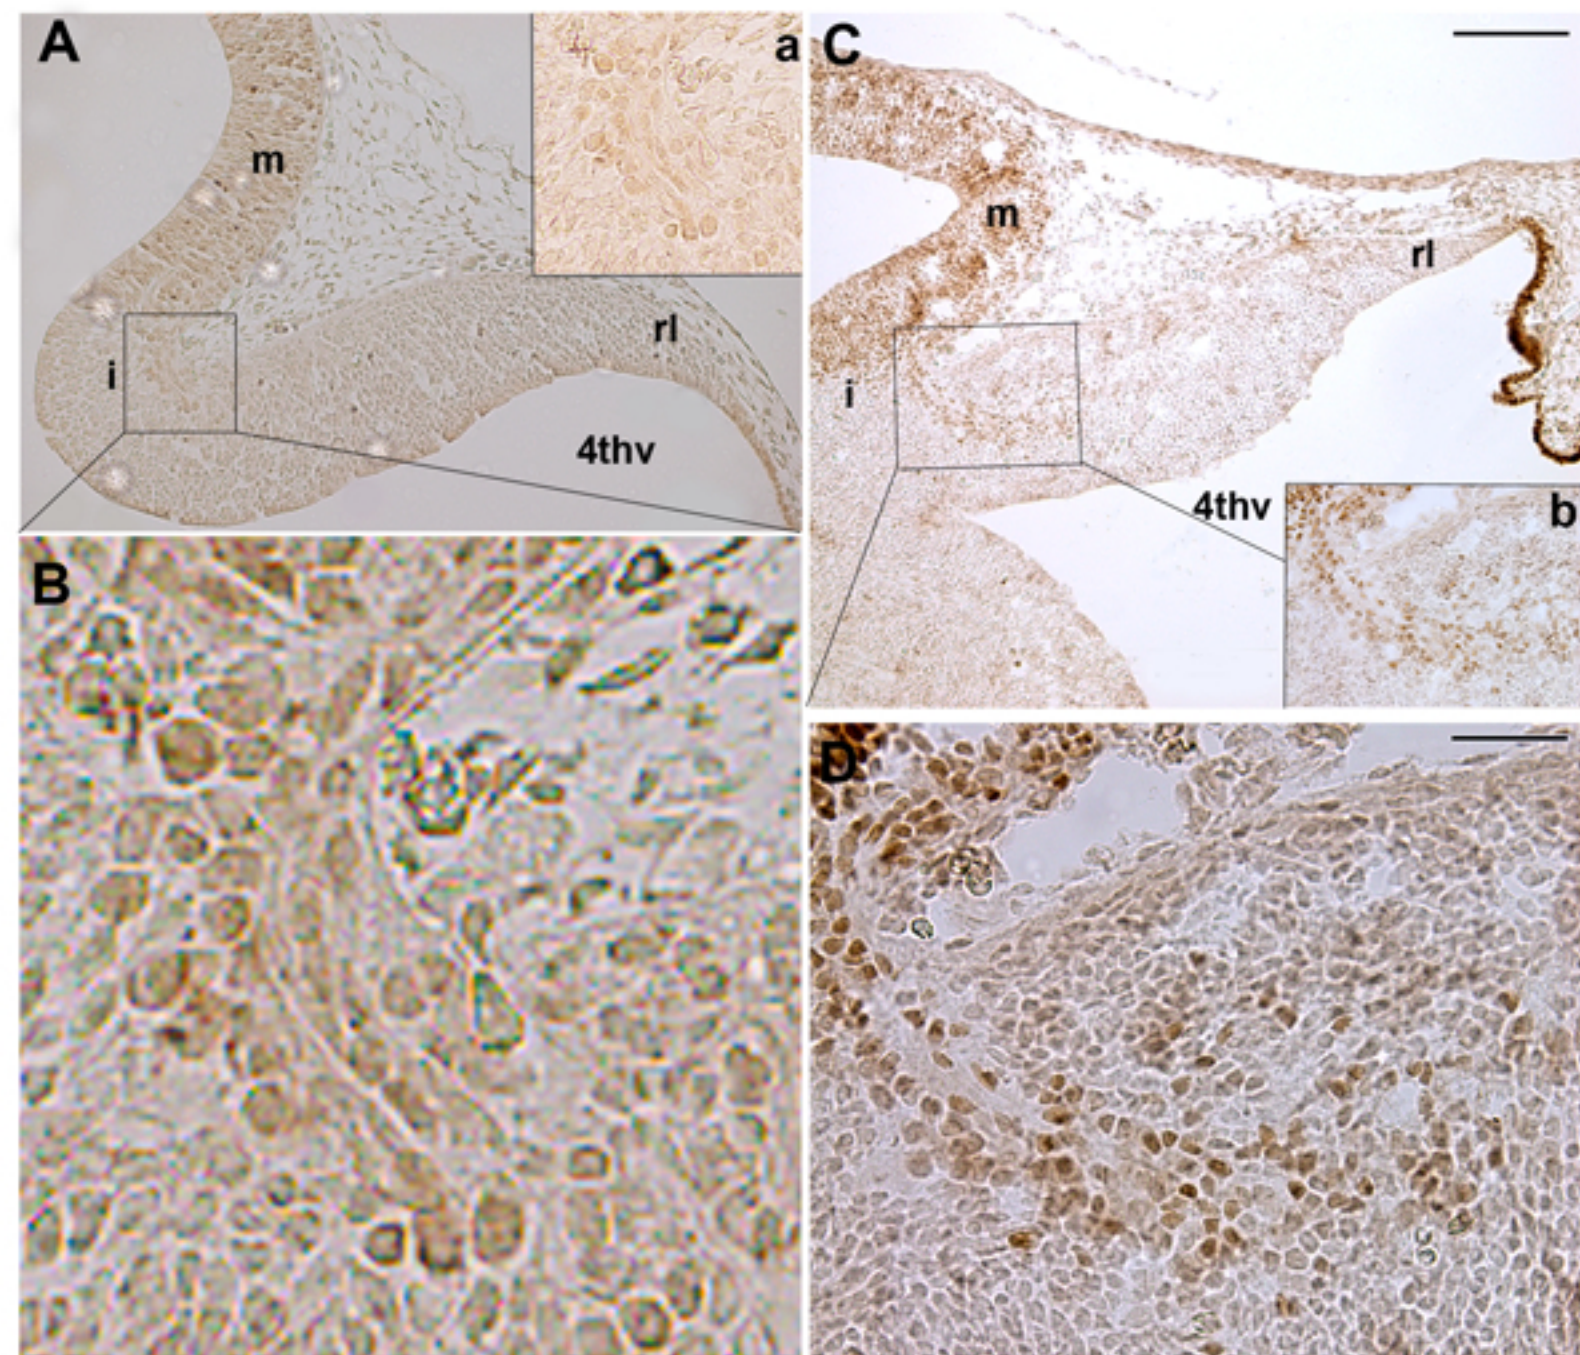



## Fig. 4

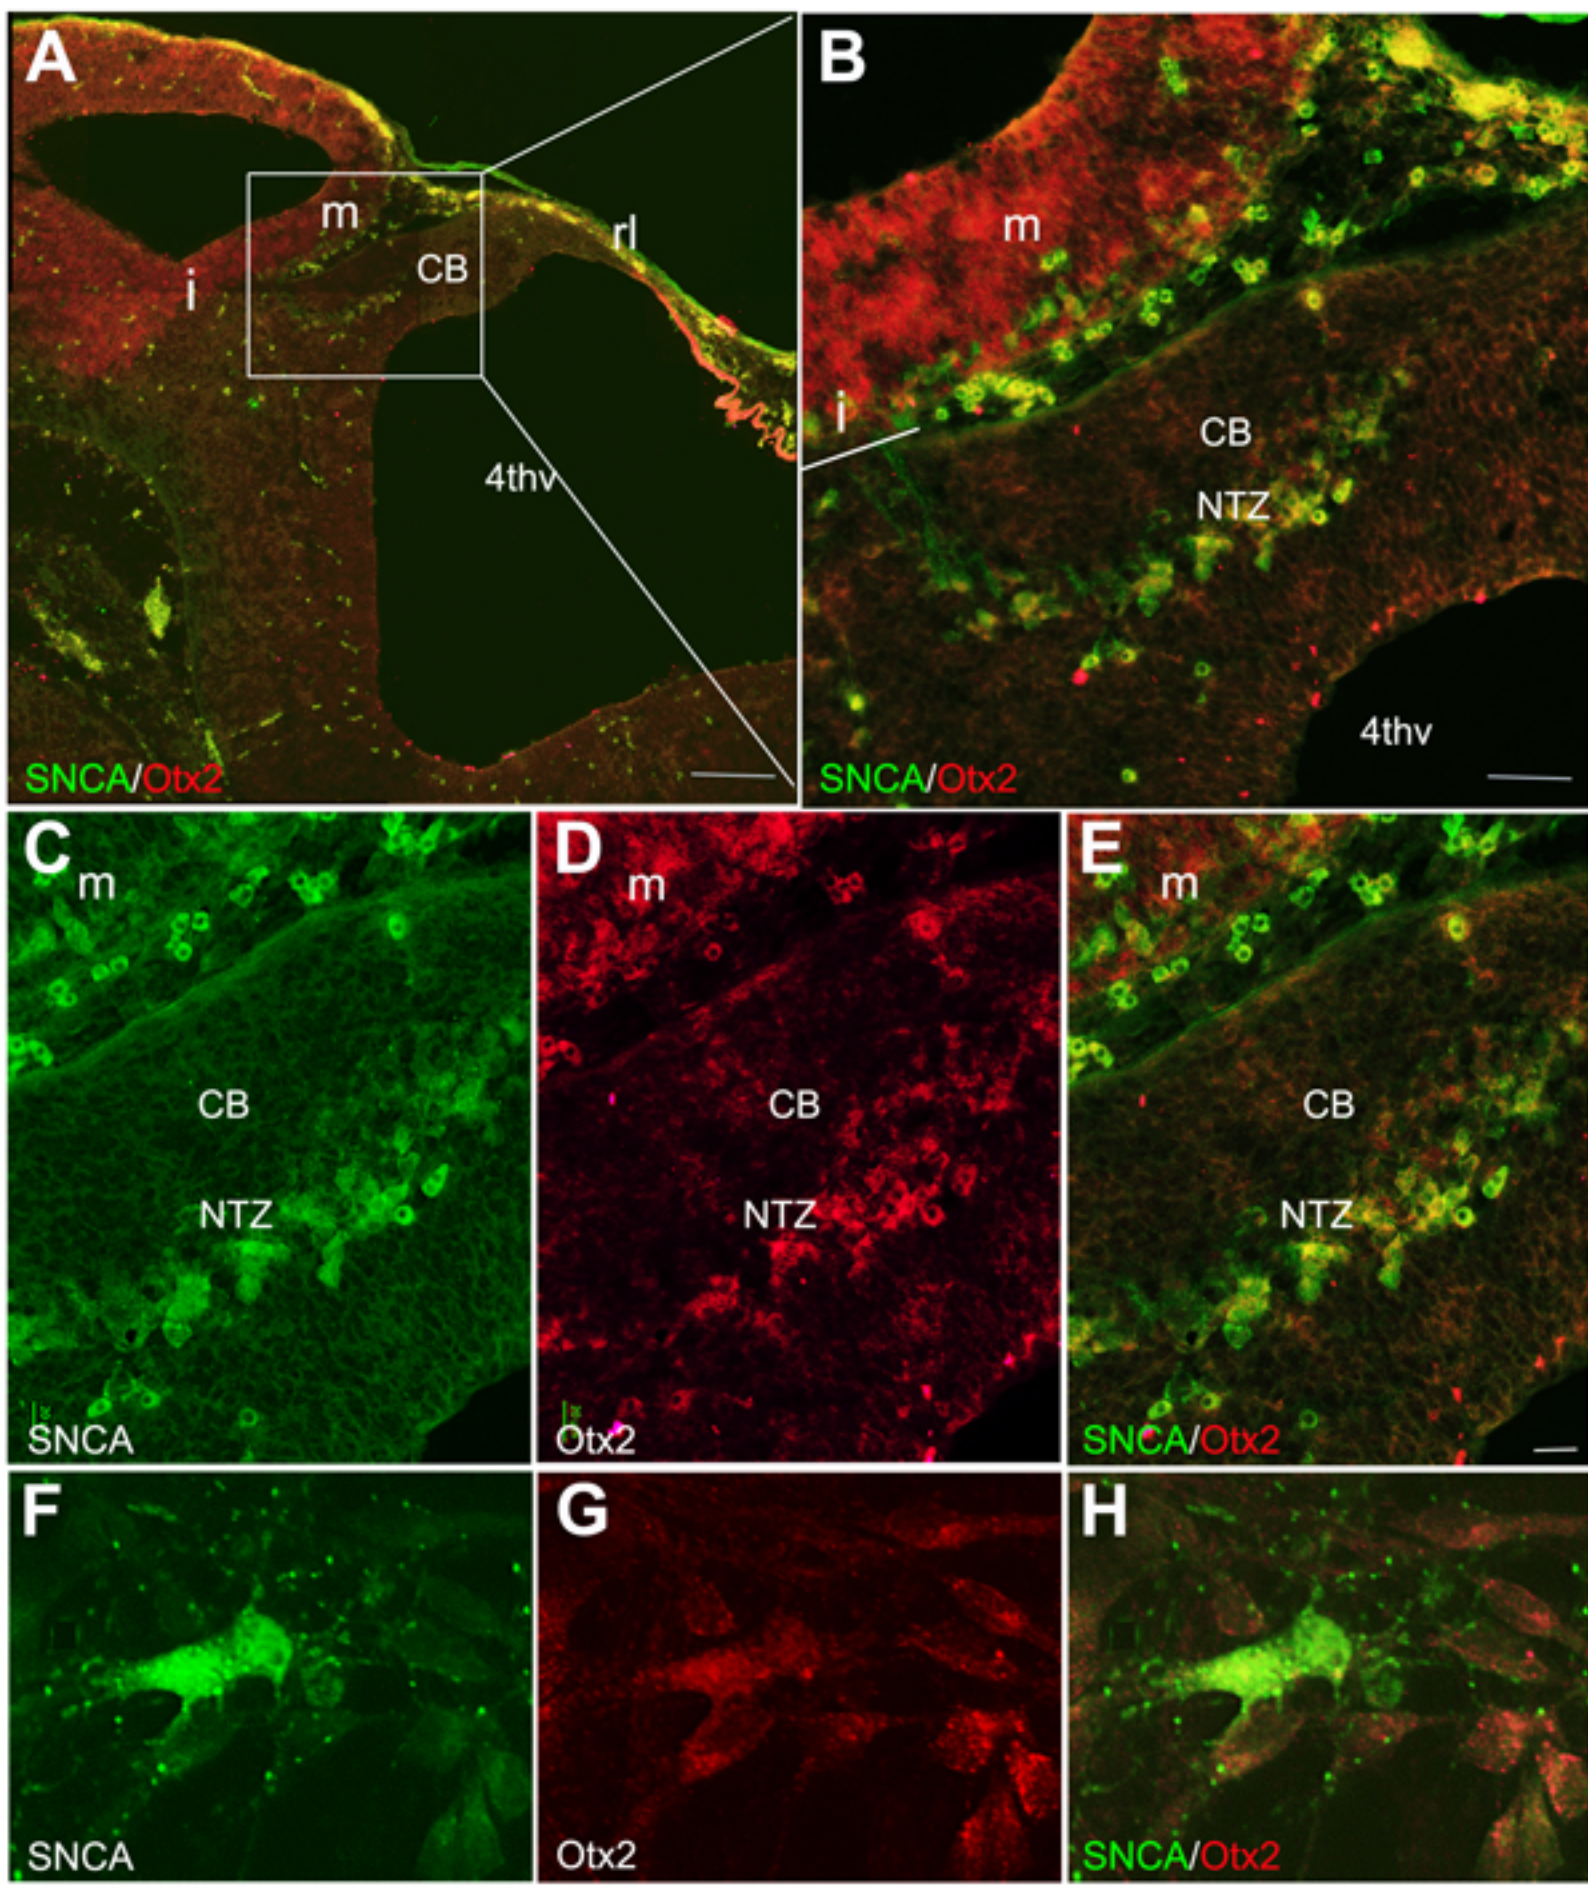

**Fig. 5**

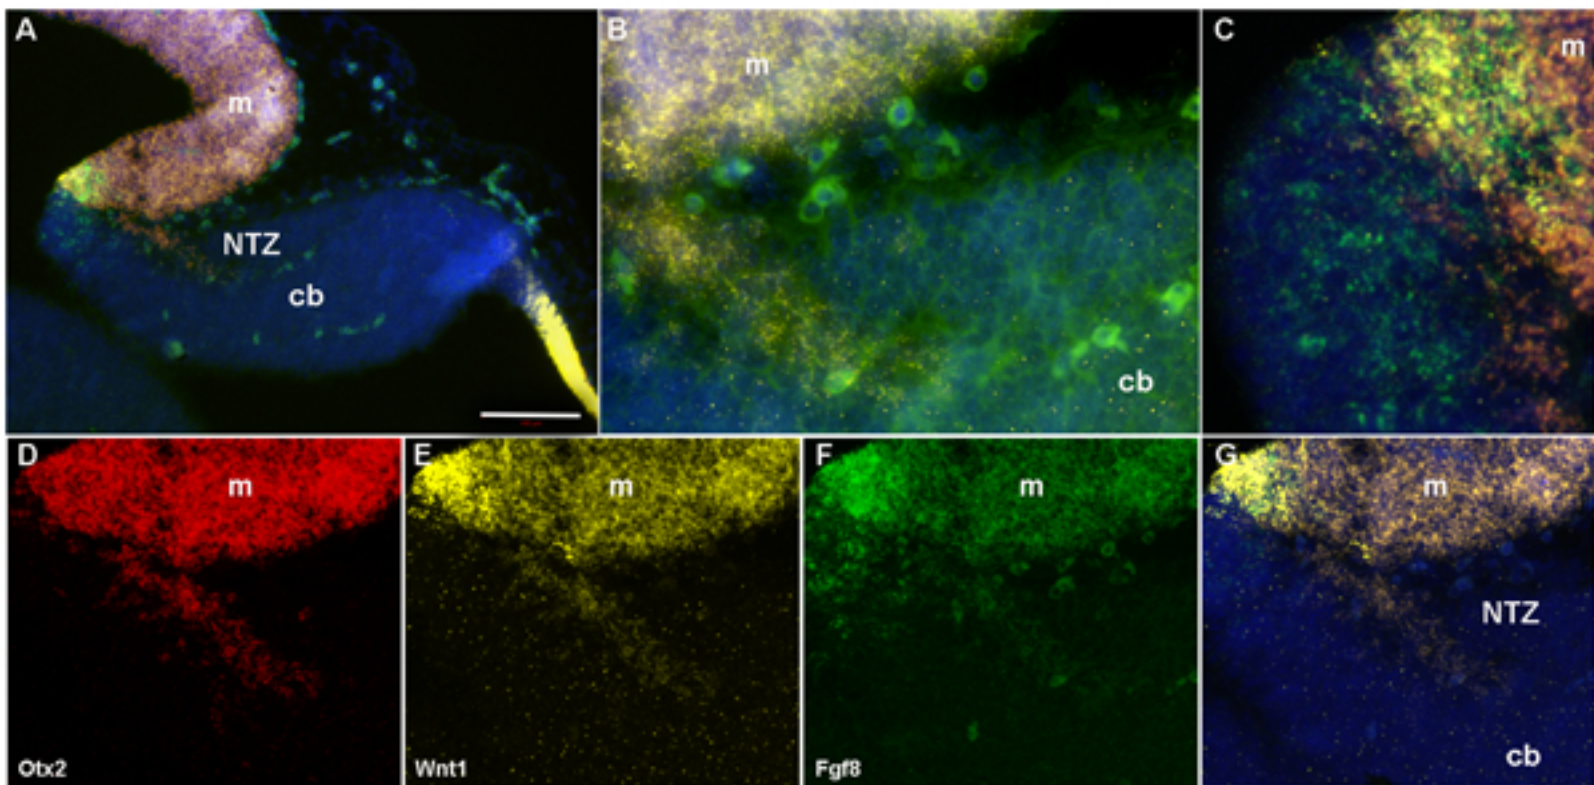

# Fig. 6

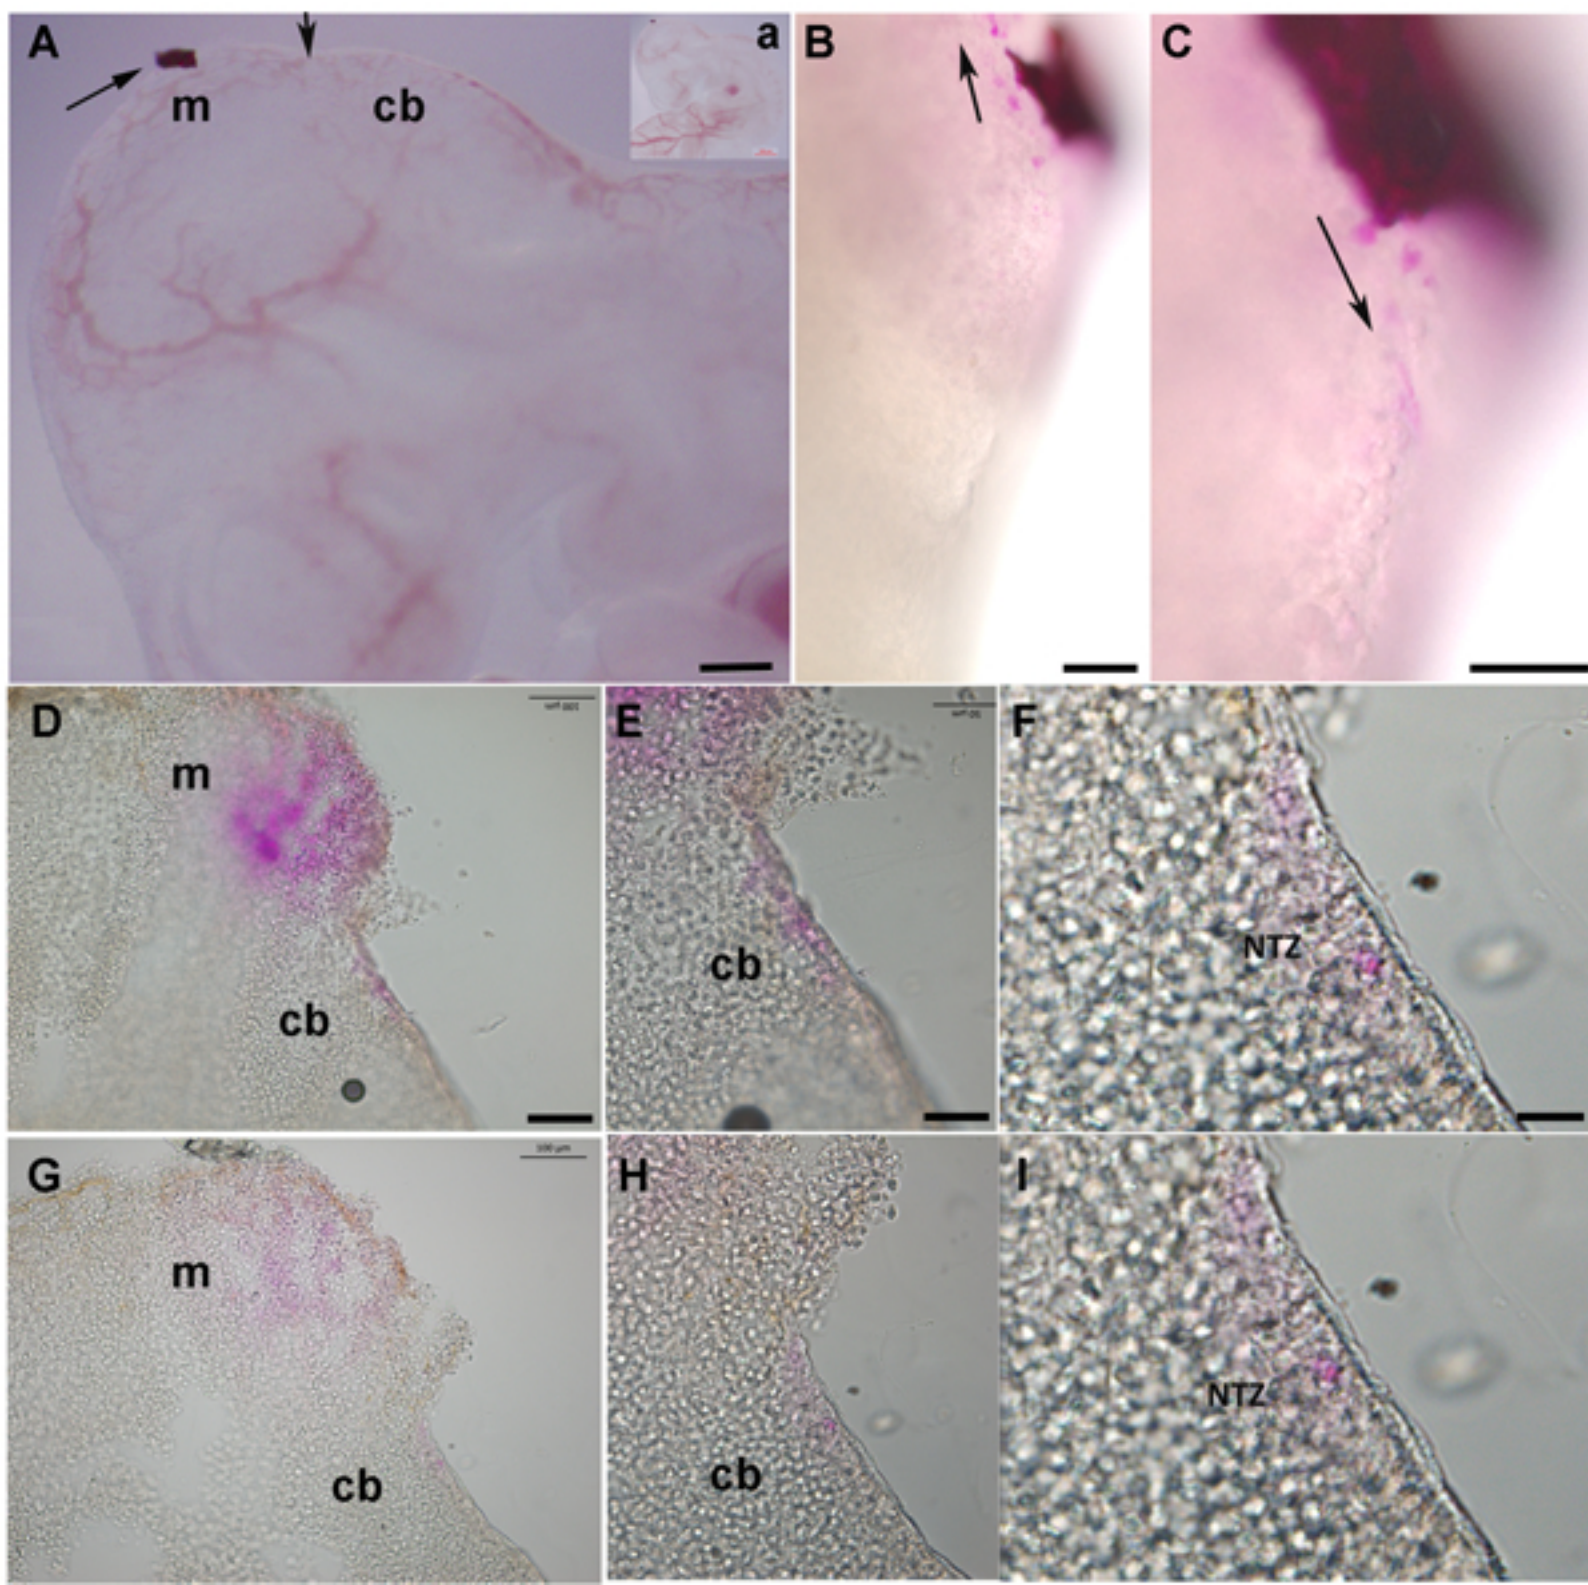

# Fig. 7

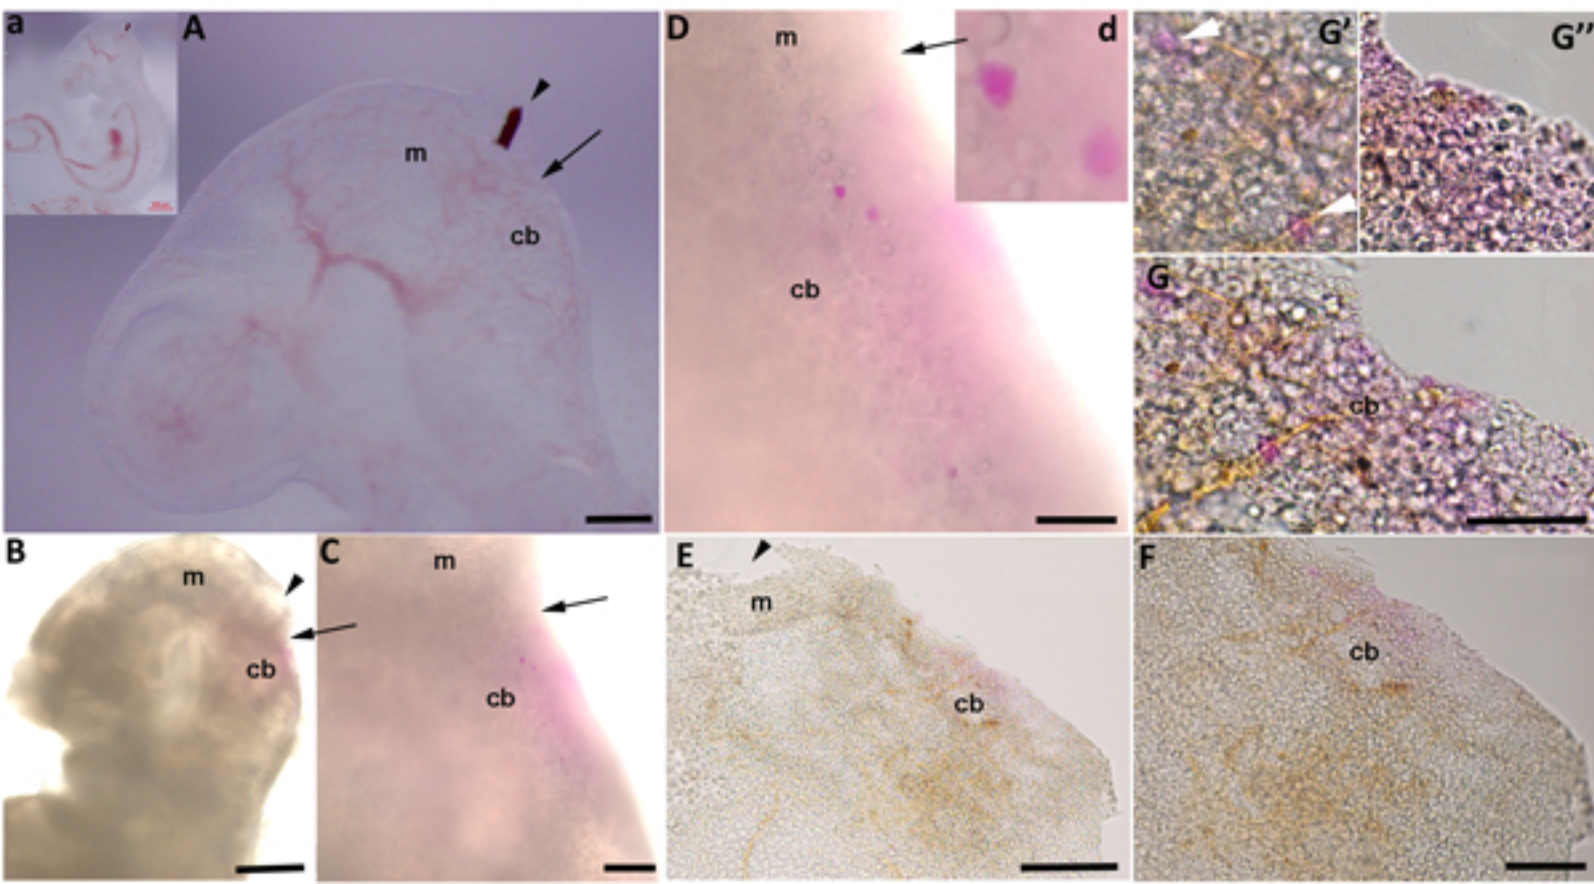

# Fig. 8

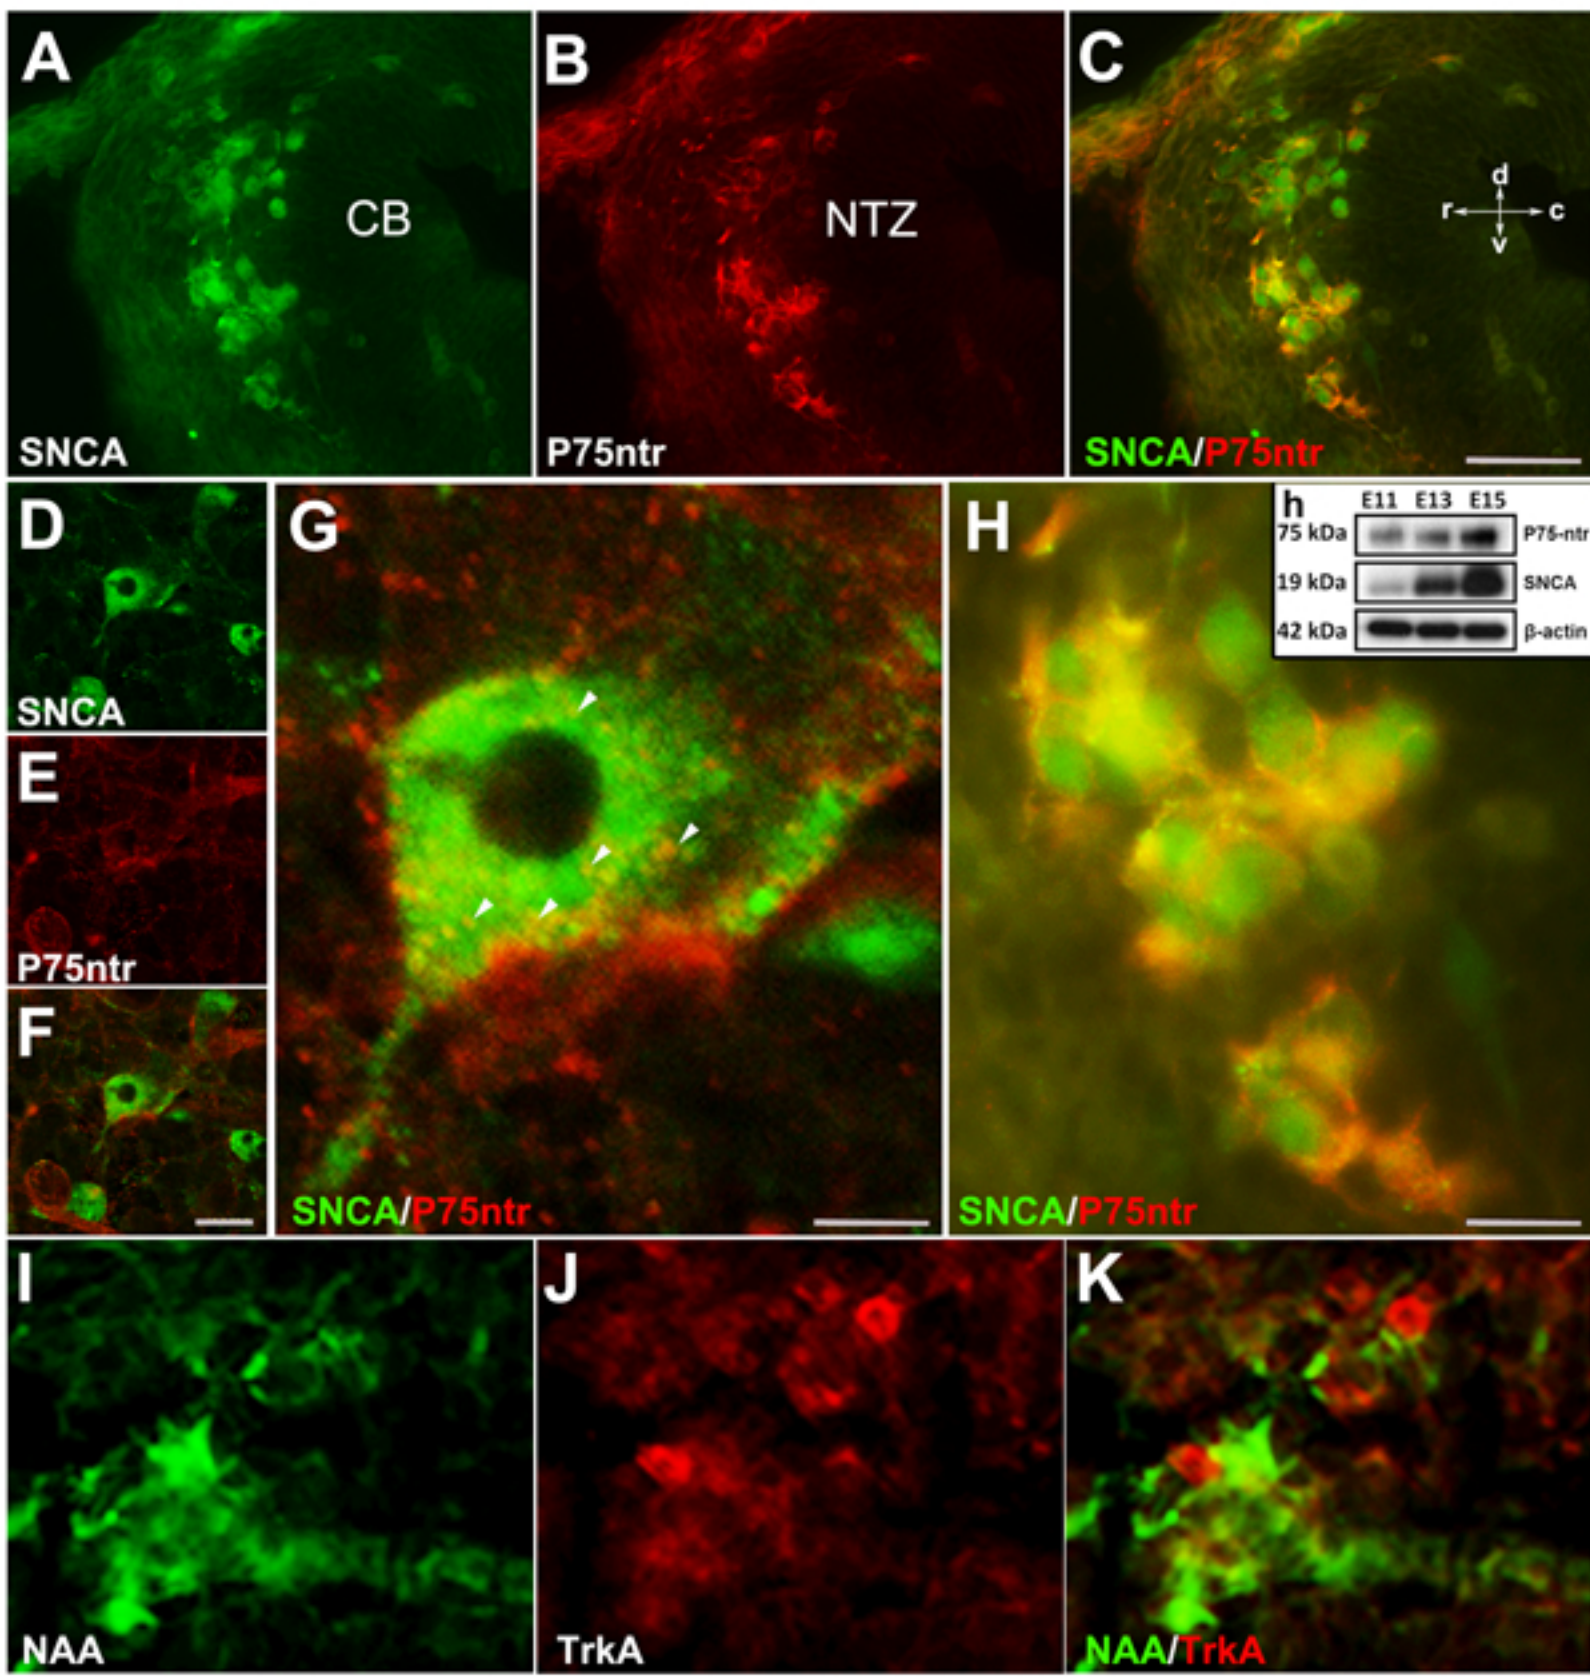

# Fig. 9

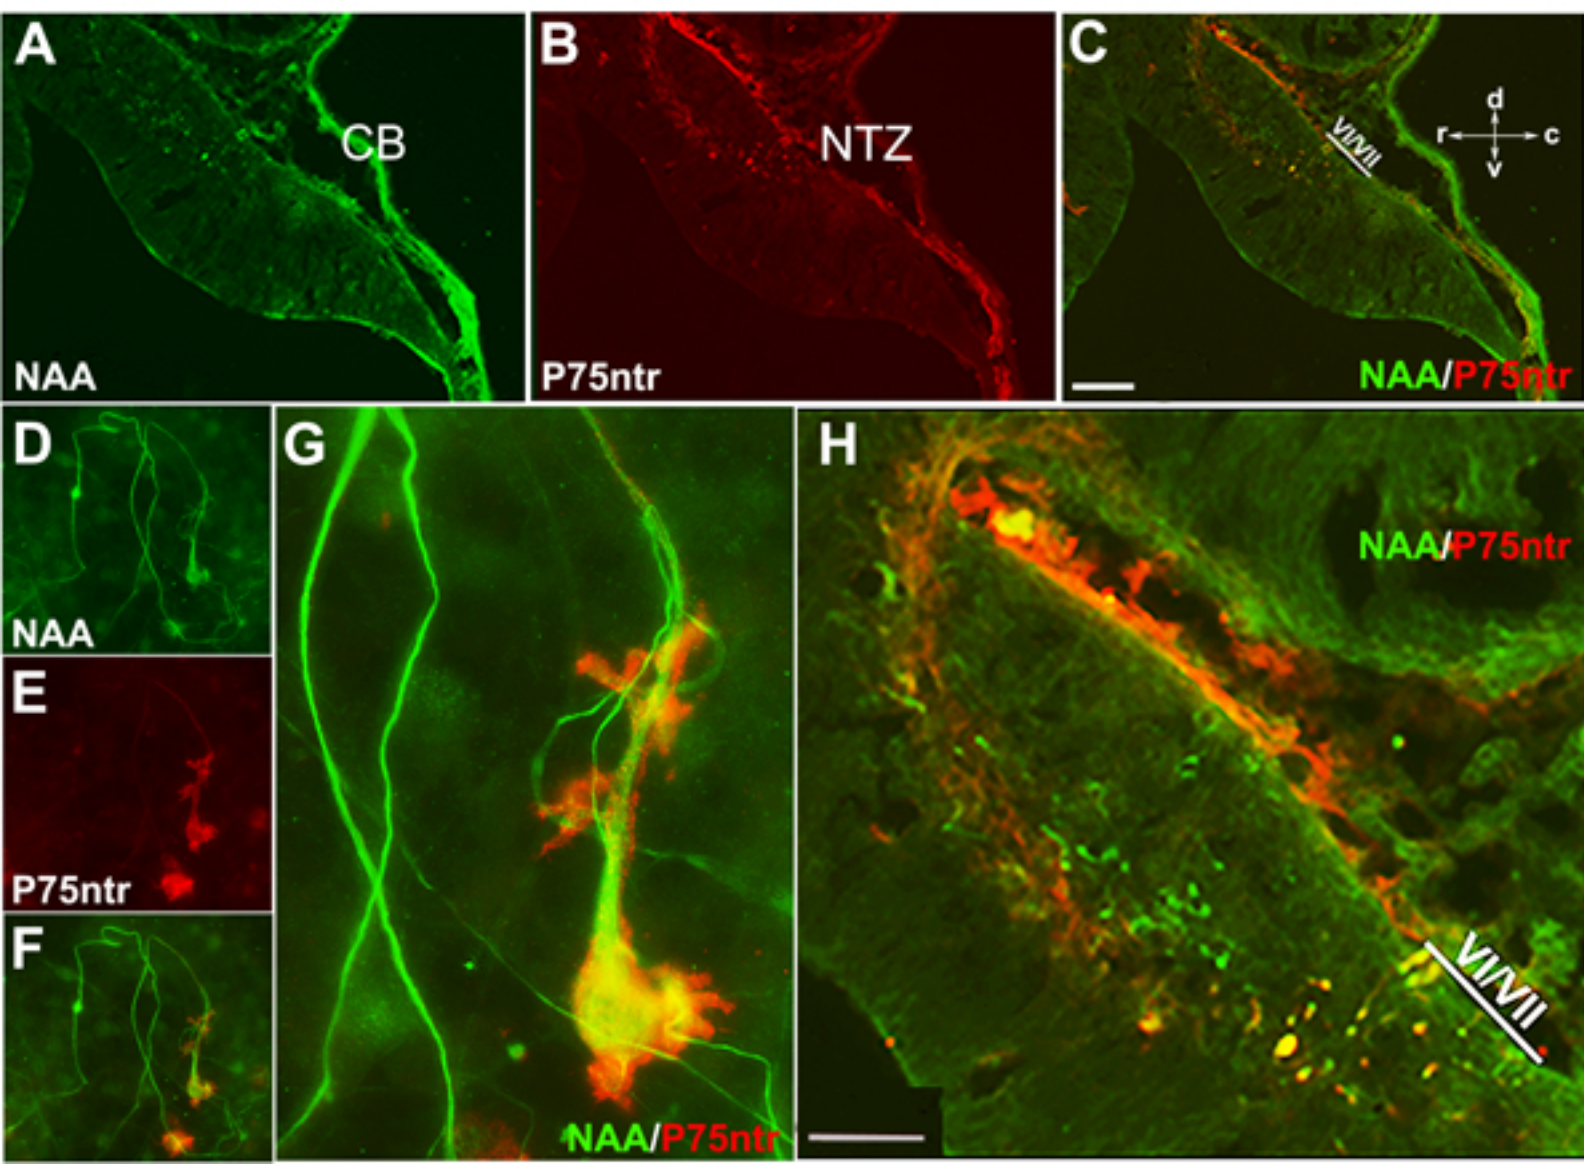

# Fig. 10

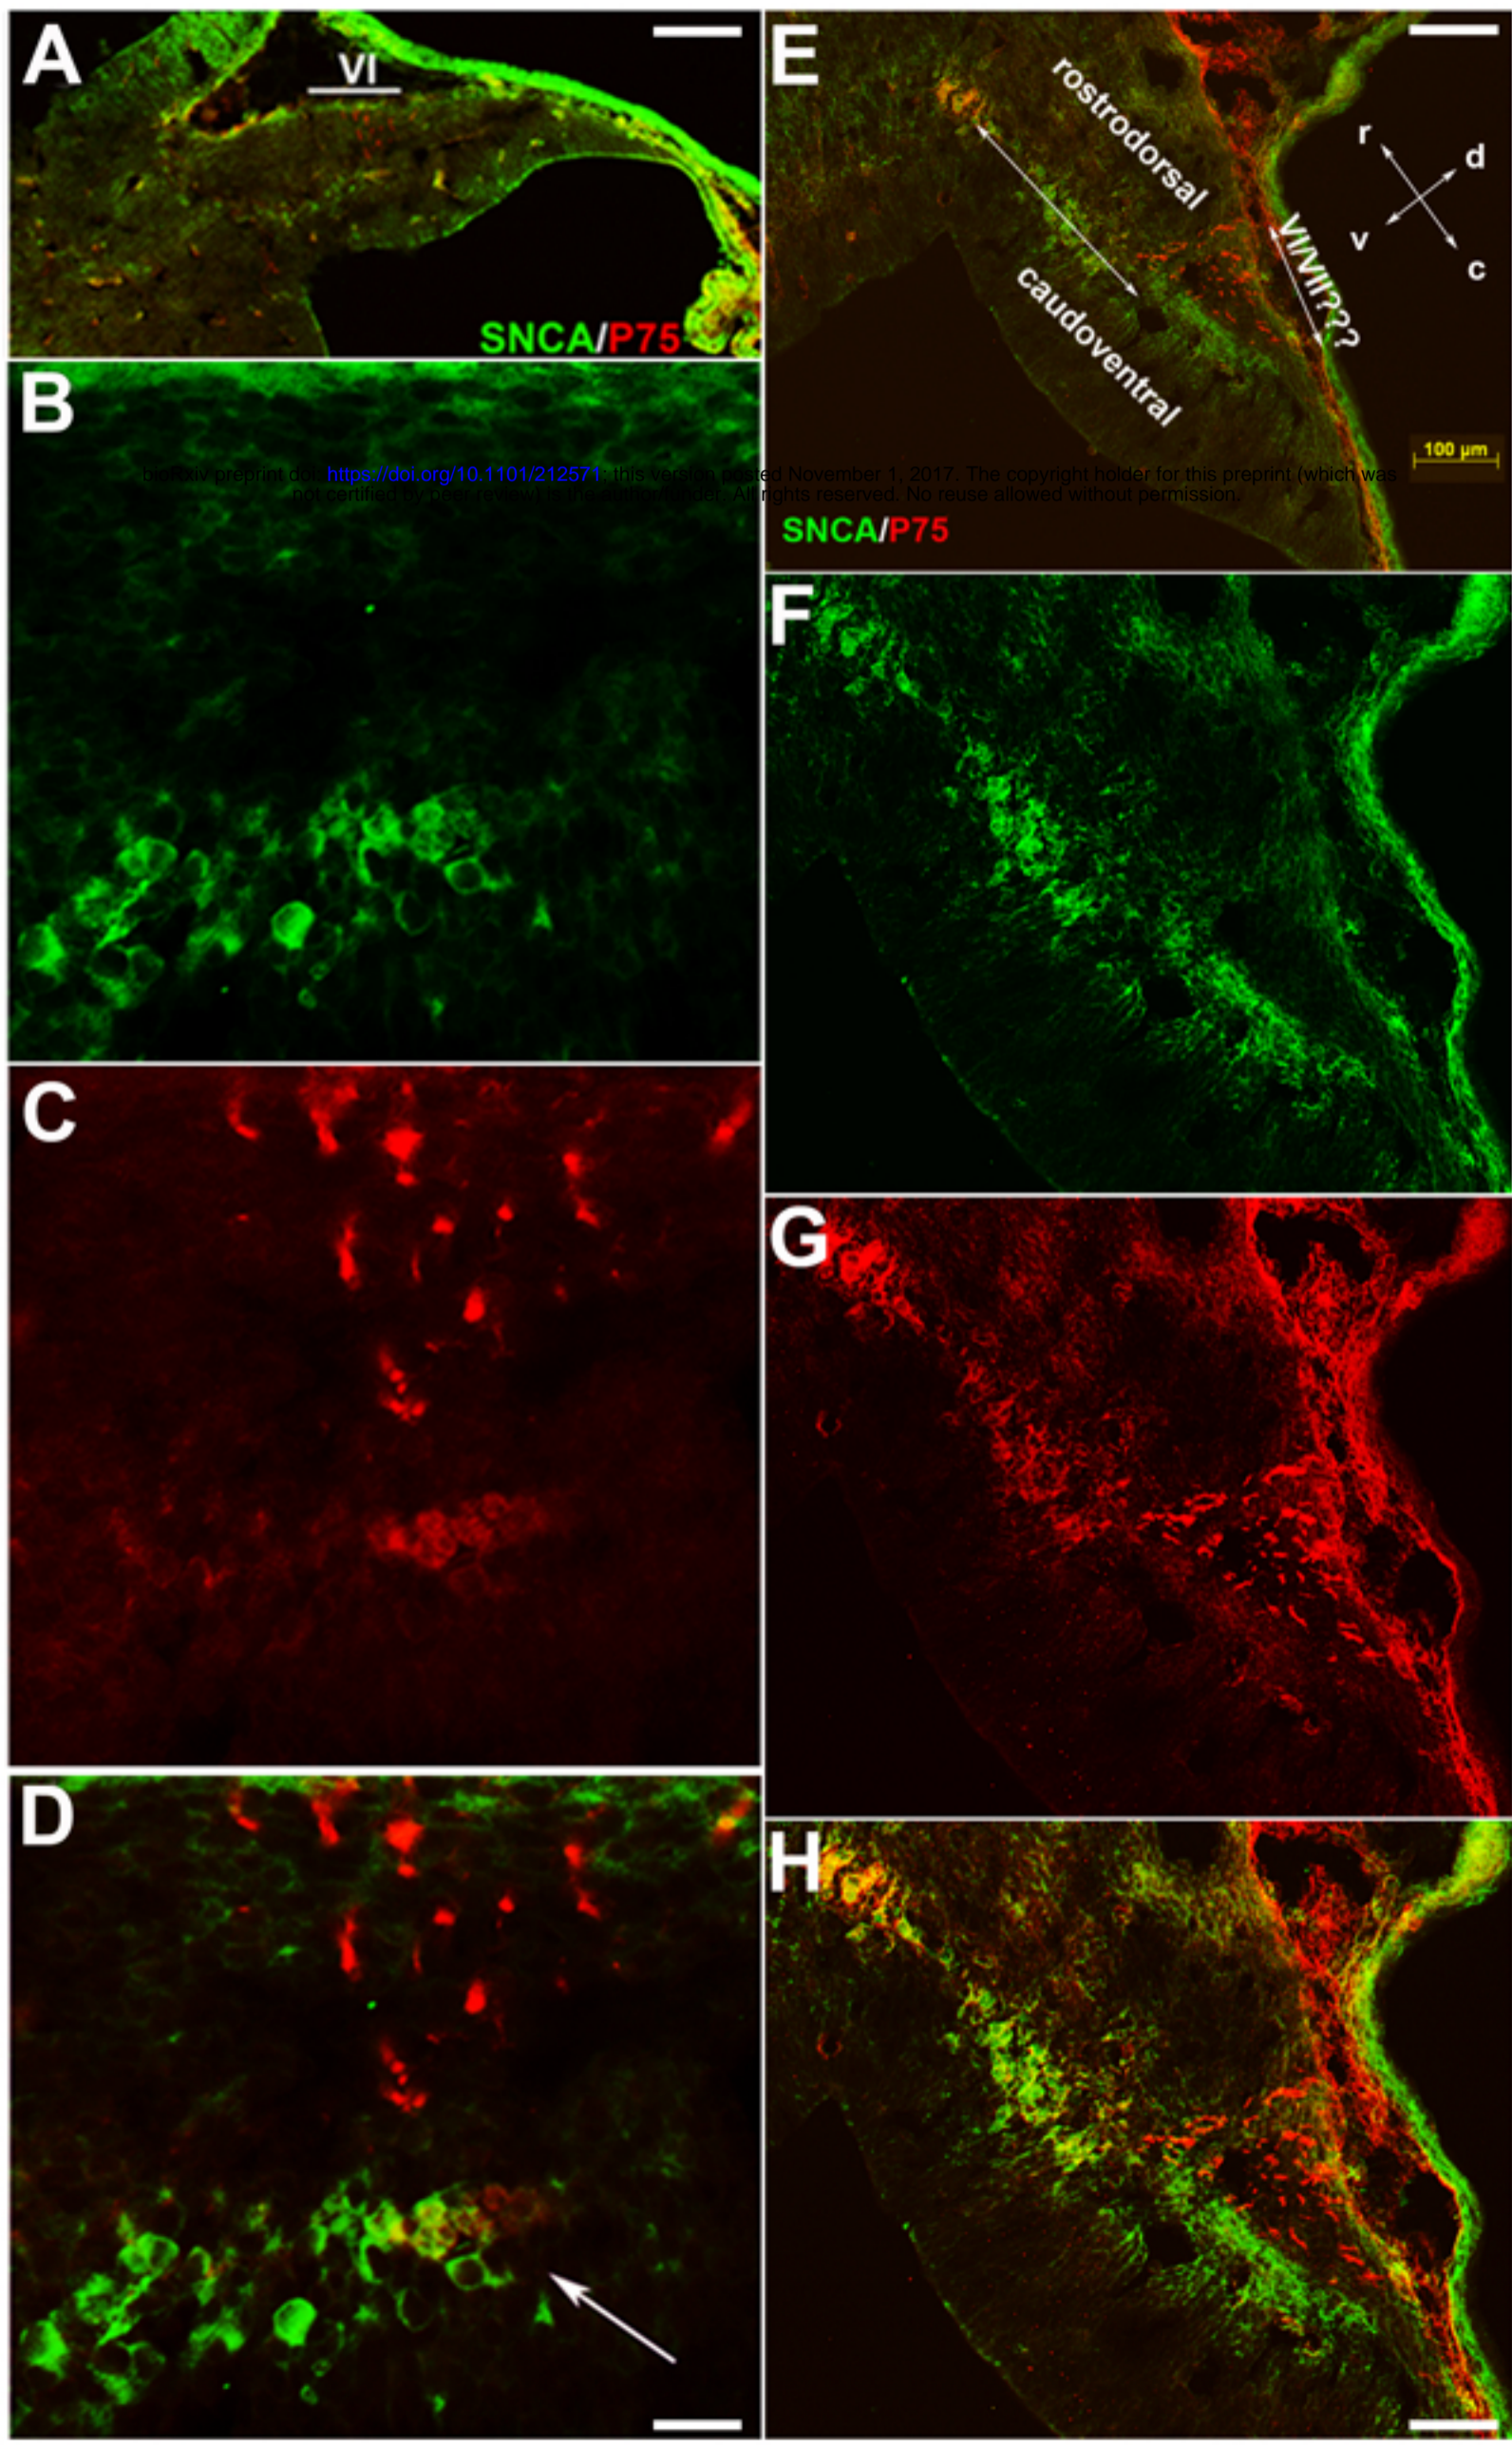

# Fig. 11

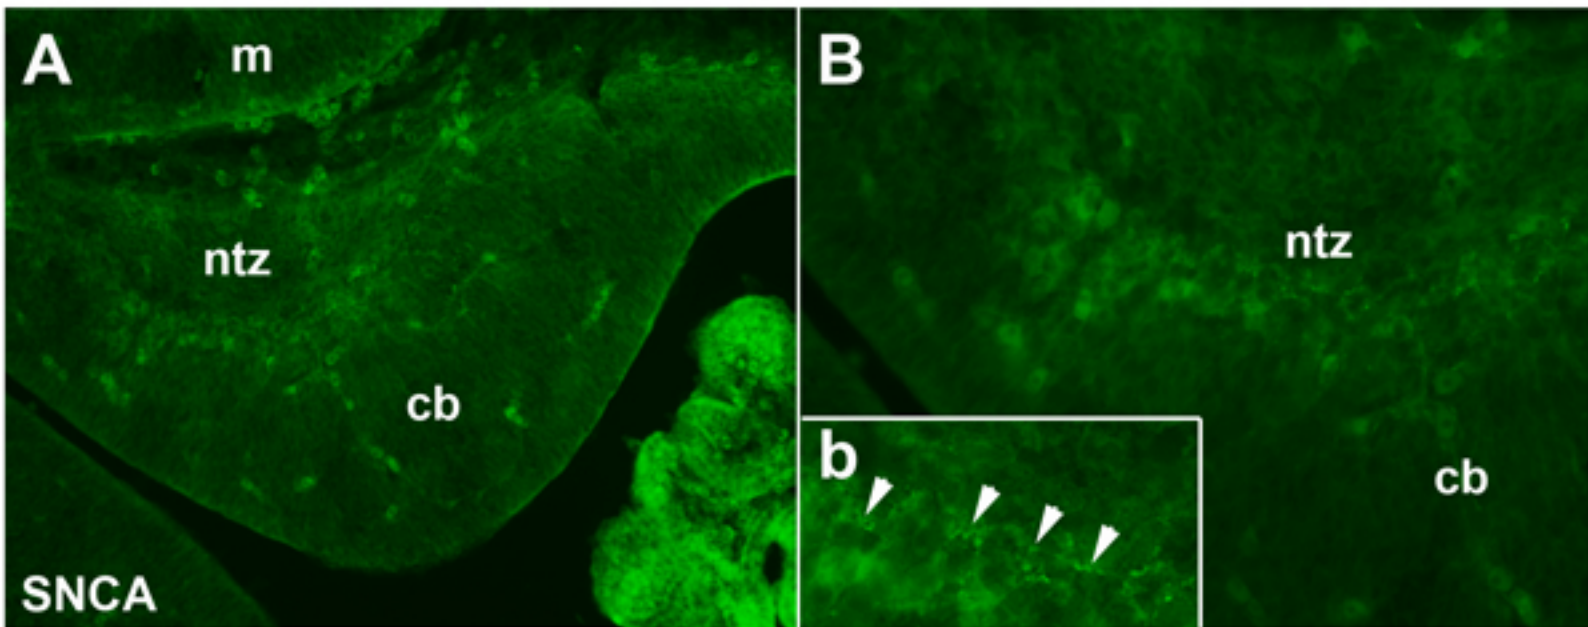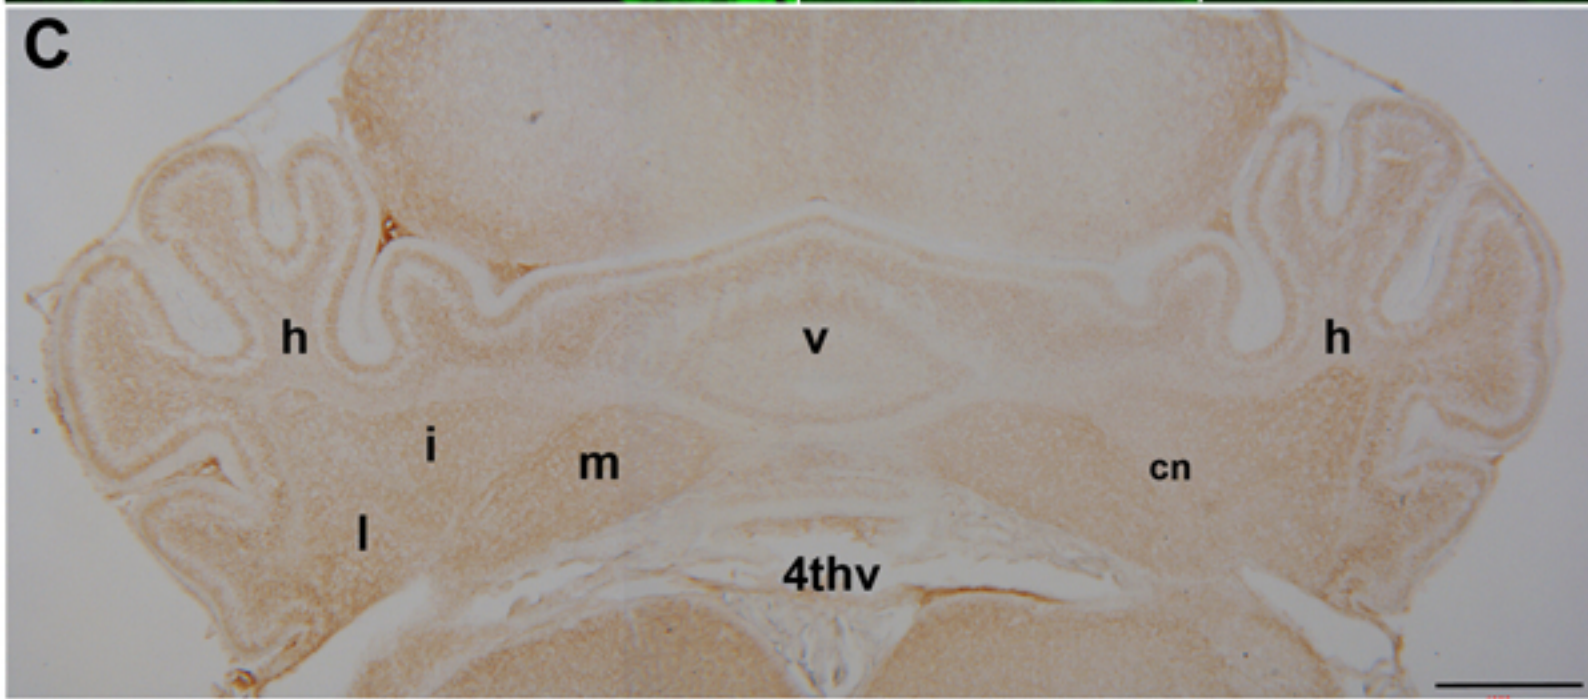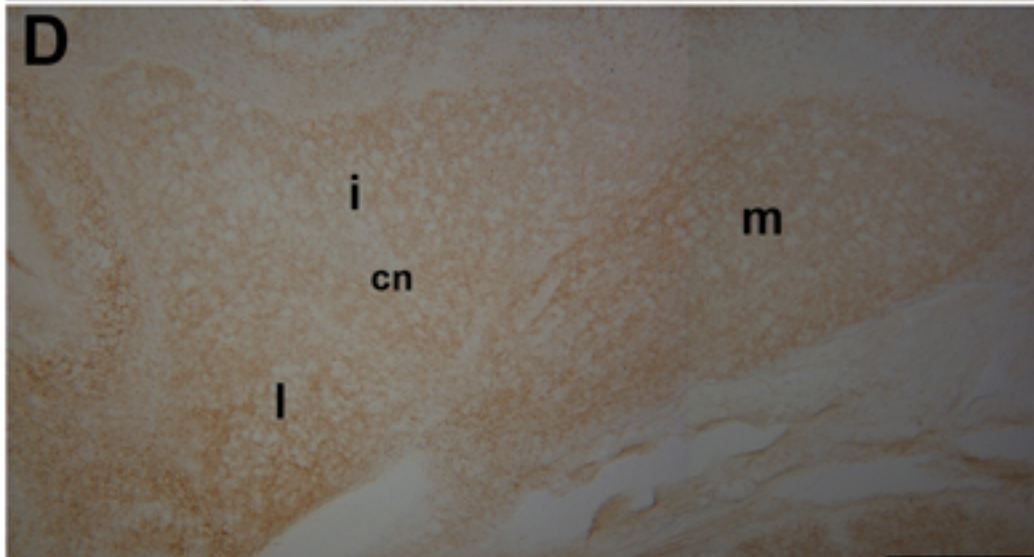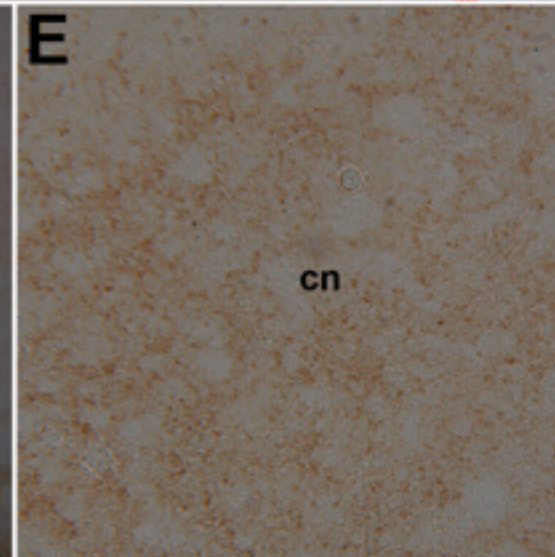



**Fig. 12**

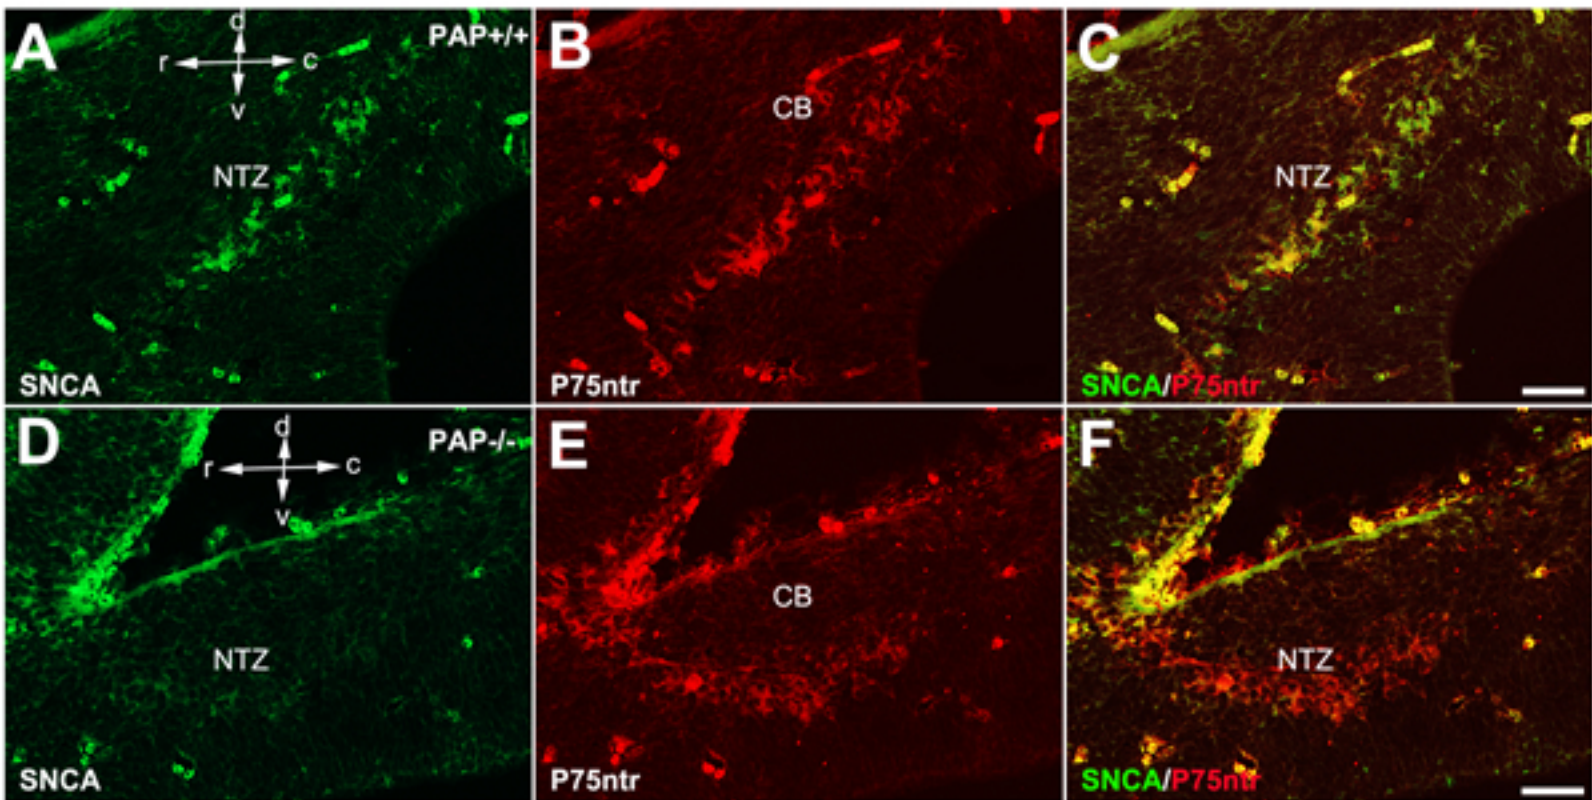

**Fig. 13**

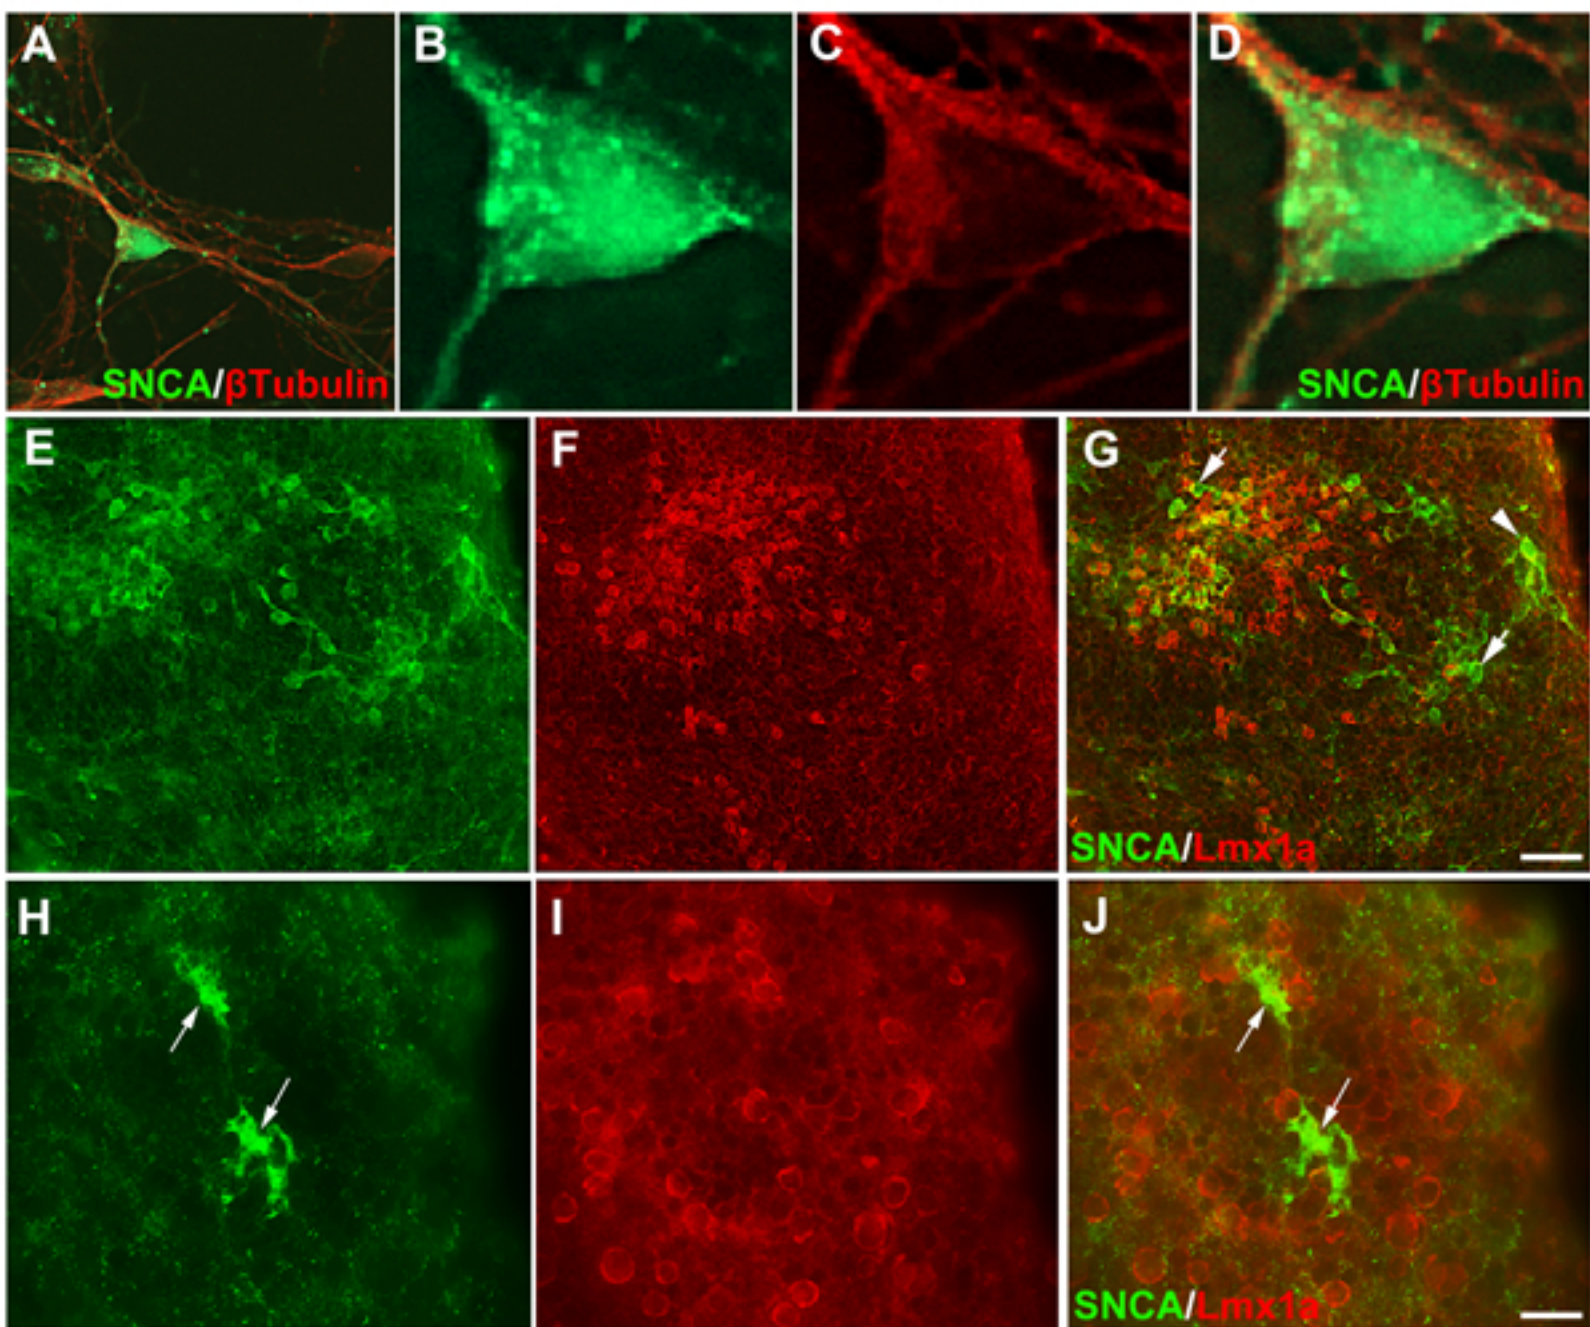

**Fig. 14**

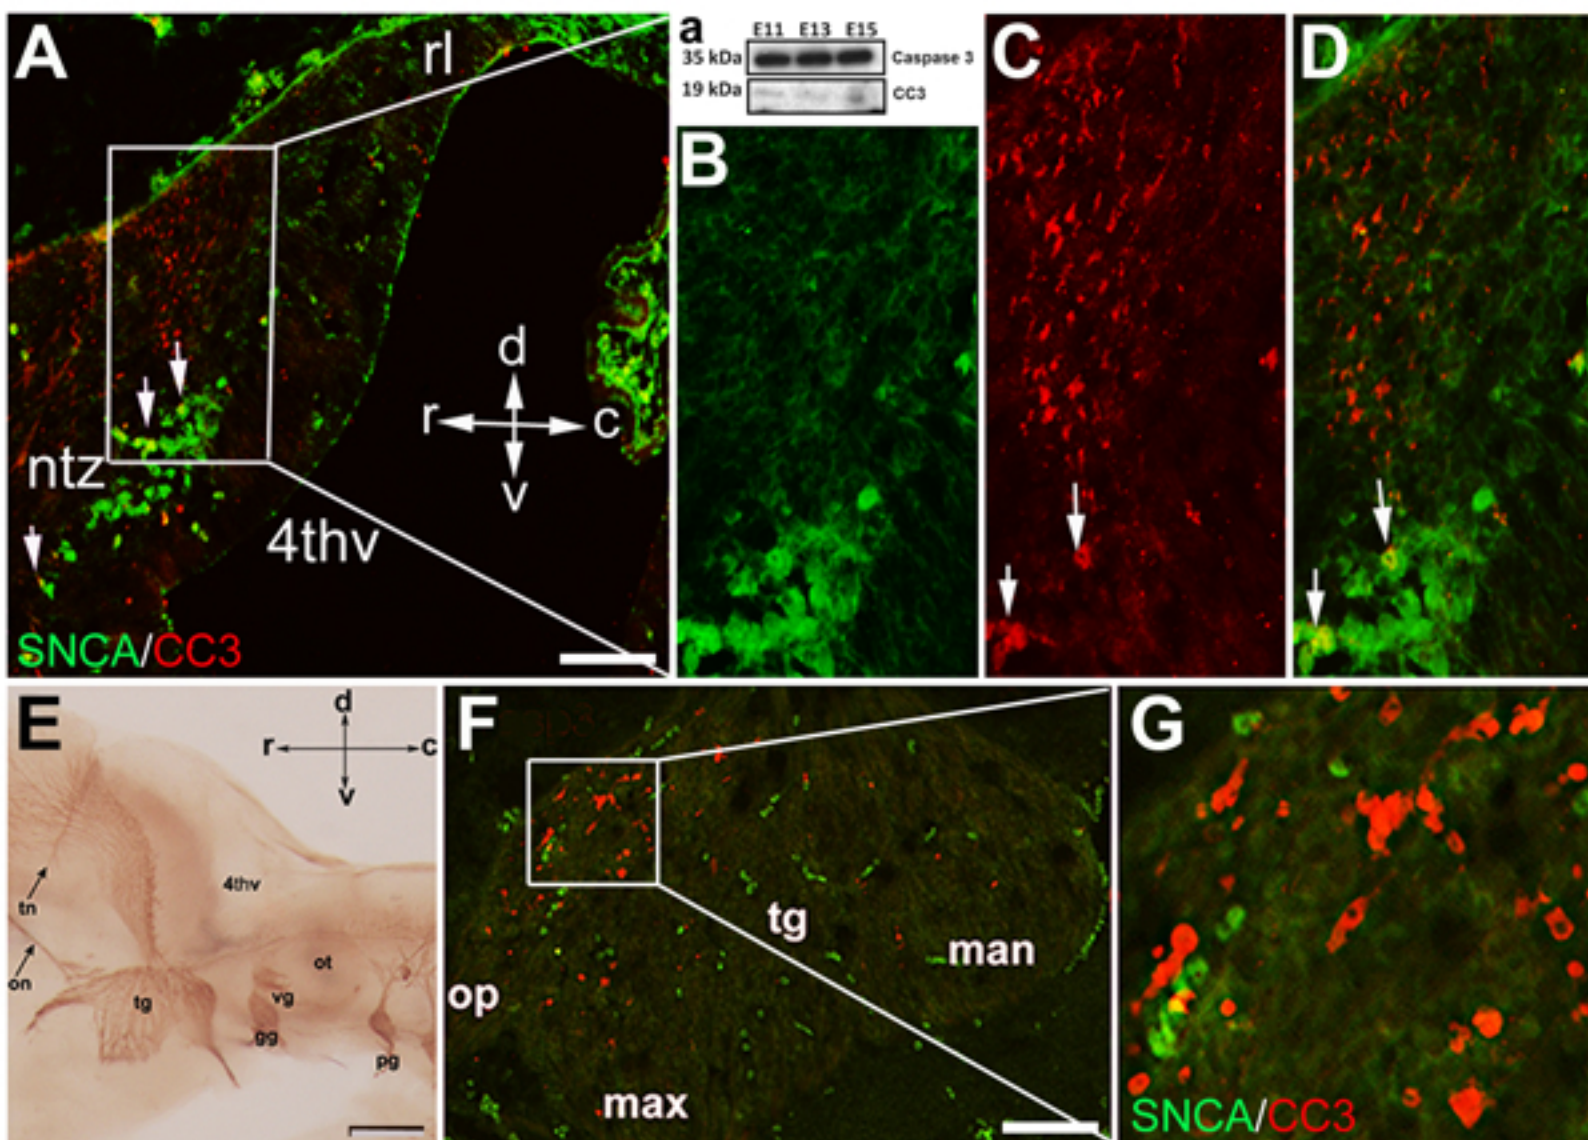

# Supplementary 12A

Primers:  
alpha-synuclein 2F-442  
Alpha-synuclein 2R-567

[1108bp]

Primers:  
alpha-synuclein 3F-645  
alpha-synuclein 3R-812

[2694bp]

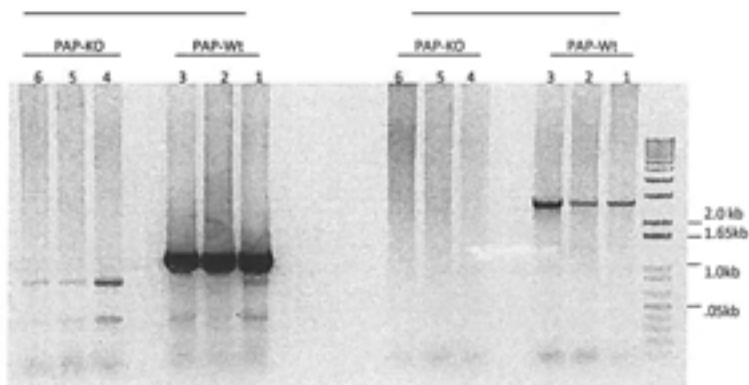

Primers:  
alpha-synuclein 2F-201  
Alpha-synuclein 2R-375

[1271bp]

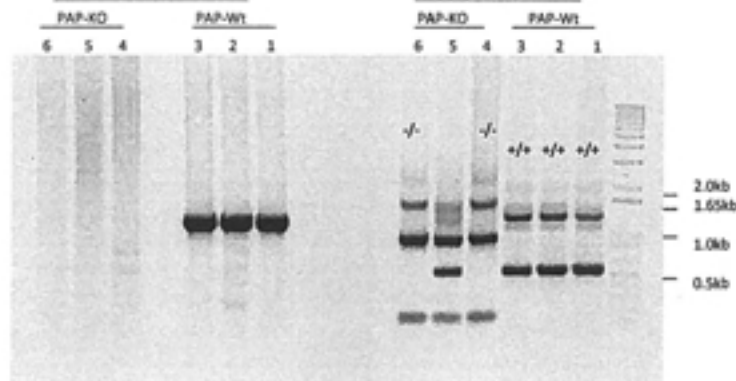

Primers:  
WT-PAP-1 Mpagl-2-2  
WT-PAP-2 Neo-2

KO(-/-): ~ 1.0kb, and ~ 1.8kb  
WT(+/-): ~ 0.5kb

Samples: mice tail  
#1,2,3 : PAP-WT  
#4,5,6 : PAP-KO

PCR for PAP-WT and PAP-KO mice genomic DNA (tails)

Primers: --- WT-PAP-1 + WT-PAP-2  
in WT(+/-) ~ 0.5kb  
in PAP KO(-/-) ~ 1.8kb

---mPAP2-2 + Neo 3  
~ 1.0kb only in PAPKO(-/-)

---alpha-synuclein 2F-201  
alpha-synuclein 2R-375 [1271bp]

---alpha-synuclein 2F-442  
alpha-synuclein 2R-567 [2694bp]

---alpha-synuclein 3F-645  
alpha-synuclein 3R-812 [1108bp]

Comment:

KO(-/-): ~ 1.0kb, and ~ 1.8kb

WT(+/-): ~ 0.5kb

# Supplementary 12B

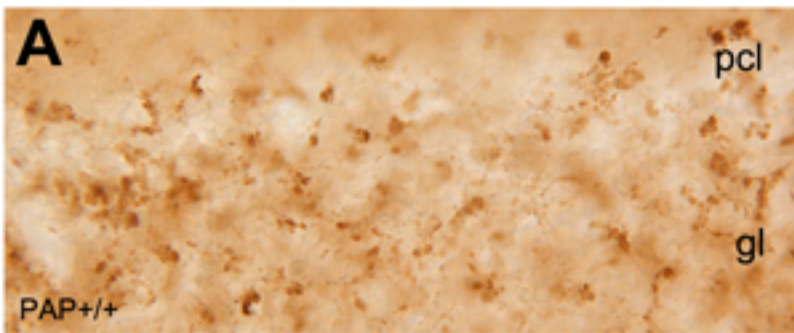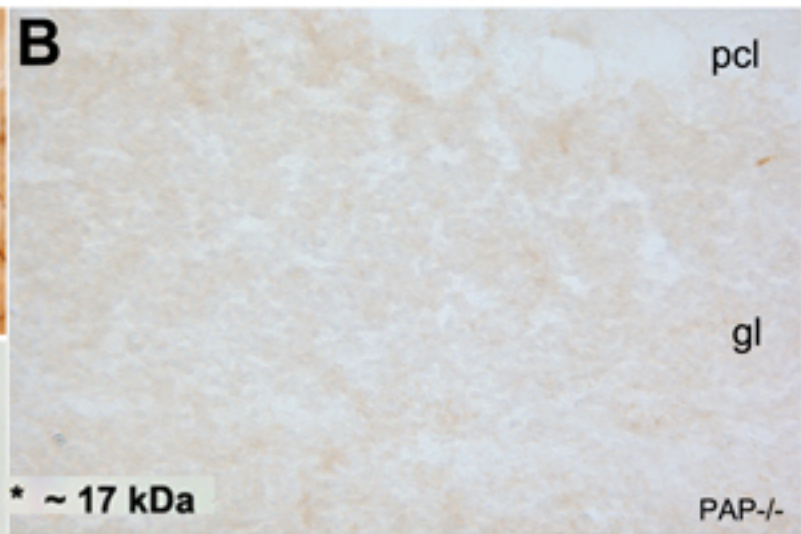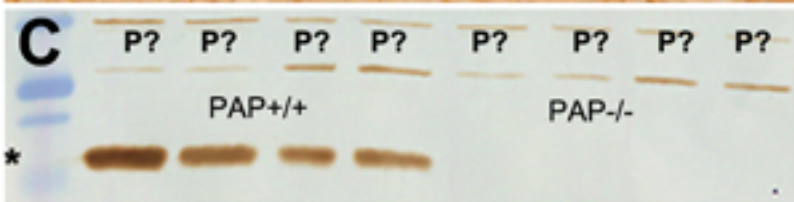

Source: https://www.biorxiv.org/content/early/2017/11/01/212571.full.pdf
